# Supplementary material for: Systemwide disassembly and assembly of SCF ubiquitin ligase complexes
Source: PubMed Central journal article supplement — Cell. 2023 Apr 27;186(9):1895–1911.e21. doi: 10.1016/j.cell.2023.02.035 (PMC10156175; doi:10.1016/j.cell.2023.02.035), 2023-04-27
Supplement: mmc1.pdf [file mmc1.pdf]

**Cell, Volume 186**

**Supplemental information**

**Systemwide disassembly and assembly  
of SCF ubiquitin ligase complexes**

**Kheewoong Baek, Daniel C. Scott, Lukas T. Henneberg, Moeko T. King, Matthias Mann, and Brenda A. Schulman**

Document S1: Tables S1-S3

Table S1. Cryo-EM statistics for WT CAND1-SCF complexes, related to Figure 1, Figure 2, and Figure S2.

| WT CAND1                               | no                   | Rolling-1            | Rolling-2            | Rolling-2           | engaged             | no                   | Rolling-1            | Rolling-2            | engaged              | engaged              |
|----------------------------------------|----------------------|----------------------|----------------------|---------------------|---------------------|----------------------|----------------------|----------------------|----------------------|----------------------|
|                                        | SCF <sup>FBXW7</sup> | SCF <sup>FBXW7</sup> | SCF <sup>FBXW7</sup> | SCF <sup>SKP2</sup> | SCF <sup>SKP2</sup> | SCF <sup>FBXO6</sup> |
| WT SCF                                 | engaged              | engaged              | engaged              | engaged             | rocked              | engaged              | engaged              | engaged              | rocked               | No SKP1-Fbp          |
| Data collection and processing         | EMD-16579            | EMD-16580            | EMD-16581            | EMD-16583           | EMD-16584           | EMD-16585            | EMD-16586            | EMD-16587            | EMD-16588            | EMD-16589            |
| Microscope                             | Glacios              |                      |                      | Glacios             |                     | Glacios              |                      |                      |                      |                      |
| Magnification                          | 22,000               |                      |                      | 22,000              |                     | 22,000               |                      |                      |                      |                      |
| Voltage (kV)                           | 200                  |                      |                      | 200                 |                     | 200                  |                      |                      |                      |                      |
| Electron exposure (e-/Å <sup>2</sup> ) | ~60                  |                      |                      | ~60                 |                     | ~60                  |                      |                      |                      |                      |
| Defocus range (µm)                     | -1.5~-3.0            |                      |                      | -1.5~-3.0           |                     | -1.5~-3.0            |                      |                      |                      |                      |
| Automation software                    | SerialEM             |                      |                      | SerialEM            |                     | SerialEM             |                      |                      |                      |                      |
| Pixel size (Å)                         | 1.885                |                      |                      | 1.885               |                     | 1.885                |                      |                      |                      |                      |
| Symmetry imposed                       | C1                   |                      |                      | C1                  |                     | C1                   |                      |                      |                      |                      |
| Movies collected                       | 2,167                |                      |                      | 2,024               |                     | 1,989                |                      |                      |                      |                      |
| Initial particle (no.)                 | 1,813,242            |                      |                      | 1,562,889           |                     | 1,594,691            |                      |                      |                      |                      |
| Final particle (no.)                   | 26,641               | 18,810               | 60,666               | 53,356              | 53,334              | 11,999               | 31,652               | 21,642               | 49,764               | 24,955               |
| Map resolution(Å)                      | 8.15 (0.143)         | 8.37 (0.143)         | 6.85 (0.143)         | 6.7 (0.143)         | 5.29 (0.143)        | 9.13 (0.143)         | 7.35 (0.143)         | 7.93 (0.143)         | 7.54 (0.143)         | 6.3 (0.143)          |
| FSC threshold                          |                      |                      |                      |                     |                     |                      |                      |                      |                      |                      |

| WT CAND1                               | Rolling-2a              | Rolling-2b  | Rolling-2c  | Rolling-2d  | Rolling-1a  | Rolling-1b  | little      | no          | no          | CAND1 (2x) no | CAND1 (2x) Rolling-1 | CAND1 (2x) Rolling-2 | CAND1 (2x) engaged |
|----------------------------------------|-------------------------|-------------|-------------|-------------|-------------|-------------|-------------|-------------|-------------|---------------|----------------------|----------------------|--------------------|
|                                        | WT SCF <sup>FBXW7</sup> | engaged       | engaged              | engaged              | engaged            |
| Data collection and processing         | EMD-14603               | EMD-14604   | EMD-14601   | EMD-14602   | EMD-14599   | EMD-14600   | EMD-14605   | EMD-14606   | EMD-14607   | EMD-14615     | EMD-14616            | EMD-16577            | EMD-16578          |
| Microscope                             | Krios                   |             |             |             |             |             |             |             |             | Glacios       |                      |                      |                    |
| Magnification                          | 105,000                 |             |             |             |             |             |             |             |             | 22,000        |                      |                      |                    |
| Voltage (kV)                           | 300                     |             |             |             |             |             |             |             |             | 200           |                      |                      |                    |
| Electron exposure (e-/Å <sup>2</sup> ) | ~68                     |             |             |             |             |             |             |             |             | ~60           |                      |                      |                    |
| Defocus range (µm)                     | -0.5 ~ -2.0             |             |             |             |             |             |             |             |             | -1.5 ~ -3.0   |                      |                      |                    |
| Automation software                    | SerialEM                |             |             |             |             |             |             |             |             | SerialEM      |                      |                      |                    |
| Pixel size (Å)                         | 0.8512                  |             |             |             |             |             |             |             |             | 1.885         |                      |                      |                    |
| Symmetry imposed                       | C1                      |             |             |             |             |             |             |             |             | C1            |                      |                      |                    |
| Movies collected                       | 14,006                  |             |             |             |             |             |             |             |             | 1,971         |                      |                      |                    |
| Initial particle (no.)                 | 4,250,310               |             |             |             |             |             |             |             |             | 1,594,265     |                      |                      |                    |
| Final particle (no.)                   | 31,620                  | 63,774      | 21,628      | 13,085      | 13,416      | 9,913       | 7,362       | 5,385       | 5,420       | 28,057        | 42,006               | 102,996              | 33,454             |
| Map resolution(Å)                      | 3.9 (0.143)             | 3.8 (0.143) | 4.7 (0.143) | 4.8 (0.143) | 4.5 (0.143) | 6.5 (0.143) | 6.6 (0.143) | 7.2 (0.143) | 6.5 (0.143) | 8.15 (0.143)  | 7.54 (0.143)         | 6.7 (0.143)          | 7.18 (0.143)       |
| FSC threshold                          |                         |             |             |             |             |             |             |             |             |               |                      |                      |                    |

**Table S2. Cryo-EM statistics for Glacios data for mutant CAND1-SCF assemblies and substrate complex bound CAND1-SCF<sup>SKP2</sup>, related to Figure 3, Figure S3, Figure 5, Figure S5, and Figure S7.**

|                                          |                         |                         |                 |                |                         |                                       |                                  |                                  |
|------------------------------------------|-------------------------|-------------------------|-----------------|----------------|-------------------------|---------------------------------------|----------------------------------|----------------------------------|
| <b>CAND1</b>                             | engaged                 | rolling                 | engaged         | rolling        | no                      | $\Delta\beta$ -hairpin partly engaged | $\Delta\beta$ -hairpin Rolling-1 | $\Delta\beta$ -hairpin Rolling-2 |
| <b>SCF<sup>SKP2</sup></b>                | rocked                  | engaged                 | rocked          | engaged        | engaged                 | no                                    | no                               | no                               |
| <b>Phospho-p27 +CKSHS1 +CyclinA-CDK2</b> | p27-CKSHS1-CyclinA-CDK2 | p27-CKSHS1-CyclinA-CDK2 | (p27)-CKSHS1    | (p27)-CKSHS1   | p27-CKSHS1-CyclinA-CDK2 |                                       |                                  |                                  |
| <b>Data collection and processing</b>    | EMD-16617               | EMD-16621               | EMD-16622       | EMD-16623      | EMD-16625               | EMD-16764                             | EMD-16765                        | EMD-16766                        |
| Microscope                               | Glacios                 |                         |                 |                |                         | Glacios                               |                                  |                                  |
| Magnification                            | 22,000                  |                         |                 |                |                         | 22,000                                |                                  |                                  |
| Voltage (kV)                             | 200                     |                         |                 |                |                         | 200                                   |                                  |                                  |
| Electron exposure (e-/Å <sup>2</sup> )   | ~60                     |                         |                 |                |                         | ~60                                   |                                  |                                  |
| Defocus range (µm)                       | -1.5 ~ -3.0             |                         |                 |                |                         | -1.5 ~ -3.0                           |                                  |                                  |
| Automation software                      | SerialEM                |                         |                 |                |                         | SerialEM                              |                                  |                                  |
| Pixel size (Å)                           | 1.885                   |                         |                 |                |                         | 1.885                                 |                                  |                                  |
| Symmetry imposed                         | C1                      |                         |                 |                |                         | C1                                    |                                  |                                  |
| Movies collected                         | 840                     |                         |                 |                |                         | 2131                                  |                                  |                                  |
| Initial particle (no.)                   | 675,469                 |                         |                 |                |                         | 1,683,753                             |                                  |                                  |
| Final particle (no.)                     | 13,968                  | 11,607                  | 16,540          | 28,965         | 43,334                  | 38,030                                | 12,020                           | 27,998                           |
| Map resolution(Å)<br>FSC threshold       | 7.73<br>(0.143)         | 8.6<br>(0.143)          | 7.35<br>(0.143) | 9.4<br>(0.143) | 7.73<br>(0.143)         | 6.1<br>(0.143)                        | 9.1<br>(0.143)                   | 7.73<br>(0.143)                  |

|                                        |                |                            |                                       |                                   |                                   |                                   |                                   |
|----------------------------------------|----------------|----------------------------|---------------------------------------|-----------------------------------|-----------------------------------|-----------------------------------|-----------------------------------|
| <b>CAND1</b>                           | engaged        | engaged                    | $\Delta\beta$ -hairpin partly engaged | $\Delta\beta$ -hairpin Rolling-2a | $\Delta\beta$ -hairpin Rolling-2b | $\Delta\beta$ -hairpin Rolling-2c | $\Delta\beta$ -hairpin Rolling-2d |
| <b>SCF<sup>FBXW7</sup></b>             | No SKP1-Fbp    | SKP1 $\Delta\Delta$ rocked | Partially rocked                      | engaged                           | engaged                           | engaged                           | engaged                           |
| <b>Data collection and processing</b>  | EMD-14608      | EMD-14609                  | EMD-14610                             | EMD-14614                         | EMD-14613                         | EMD-14612                         | EMD-14611                         |
| Microscope                             | Glacios        |                            | Glacios                               |                                   |                                   |                                   |                                   |
| Magnification                          | 22,000         |                            | 22,000                                |                                   |                                   |                                   |                                   |
| Voltage (kV)                           | 200            |                            | 200                                   |                                   |                                   |                                   |                                   |
| Electron exposure (e-/Å <sup>2</sup> ) | ~60            |                            | ~60                                   |                                   |                                   |                                   |                                   |
| Defocus range (µm)                     | -1.5 ~ -3.0    |                            | -1.5 ~ -3.0                           |                                   |                                   |                                   |                                   |
| Automation software                    | SerialEM       |                            | SerialEM                              |                                   |                                   |                                   |                                   |
| Pixel size (Å)                         | 1.885          |                            | 1.885                                 |                                   |                                   |                                   |                                   |
| Symmetry imposed                       | C1             |                            | C1                                    |                                   |                                   |                                   |                                   |
| Movies collected                       | 2,208          |                            | 2,355                                 |                                   |                                   |                                   |                                   |
| Initial particle (no.)                 | 1,759,987      |                            | 1,979,155                             |                                   |                                   |                                   |                                   |
| Final particle (no.)                   | 50,363         | 34,667                     | 113,745                               | 44,926                            | 73,155                            | 19,053                            | 20,378                            |
| Map resolution(Å)<br>FSC threshold     | 5.8<br>(0.143) | 6.1<br>(0.143)             | 5.9<br>(0.143)                        | 7.0<br>(0.143)                    | 6.7<br>(0.143)                    | 8.4<br>(0.143)                    | 8.6<br>(0.143)                    |

**Table S3. Cryo-EM statistics for Krios data for CAND1-CUL1-RBX1 and CAND1-SCF<sup>SKP2</sup> complexes, related to Figure 4, Figure S4, Figure 5, Figure S5, Figure 6, and Figure S6.**

|                                                  |                                       |                                       |                                       |           |                                       |                                       |                                |                                       |                                       |
|--------------------------------------------------|---------------------------------------|---------------------------------------|---------------------------------------|-----------|---------------------------------------|---------------------------------------|--------------------------------|---------------------------------------|---------------------------------------|
| <b>CAND1</b>                                     | engaged                               | engaged                               | Rolling-2                             | Rolling-1 | engaged                               | $\Delta\beta$ -hairpin partly engaged | $\Delta\beta$ -hairpin rolling | $\beta$ -hairpin++ partly engaged     | $\beta$ -hairpin++ rolling            |
| <b>SCF<sup>SKP2</sup></b>                        | -                                     | rocked                                | engaged                               | engaged   | SKP1 $\Delta\Delta$ rocked            | Partly rocked                         | engaged                        | Partly rocked                         | engaged                               |
|                                                  | EMD-14561                             | EMD-14563                             | EMD-14594                             | EMD-16582 | EMD-14595                             | EMD-14597                             | EMD-14598                      | EMD-16576                             | EMD-16575                             |
|                                                  | PDB-7Z8R                              | PDB-7Z8T                              | PDB-7ZBW                              |           | PDB-7Z8V                              | PDB-7ZBZ                              |                                | PDB-8CDK                              | PDB-8CDJ                              |
| <b>Data collection and processing</b>            |                                       |                                       |                                       |           |                                       |                                       |                                |                                       |                                       |
| Microscope                                       | Krios                                 |                                       |                                       |           |                                       |                                       |                                |                                       |                                       |
| Magnification                                    | 105,000                               |                                       | 105,000                               |           | 105,000                               |                                       | 105,000                        |                                       | 105,000                               |
| Voltage (kV)                                     | 300                                   |                                       | 300                                   |           | 300                                   |                                       | 300                            |                                       | 300                                   |
| Electron exposure (e-/Å <sup>2</sup> )           | ~68                                   |                                       | ~68                                   |           | ~68                                   |                                       | ~68                            |                                       | ~68                                   |
| Defocus range (μm)                               | -0.5 ~ -2.0                           |                                       | -0.5 ~ -2.0                           |           | -0.5 ~ -2.0                           |                                       | -0.5 ~ -2.0                    |                                       | -0.5 ~ -2.0                           |
| Automation software                              | SerialEM                              |                                       | SerialEM                              |           | SerialEM                              |                                       | SerialEM                       |                                       | SerialEM                              |
| Pixel size (Å)                                   | 0.8512                                |                                       | 0.8512                                |           | 0.8512                                |                                       | 0.8512                         |                                       | 0.8512                                |
| Symmetry imposed                                 | C1                                    |                                       | C1                                    |           | C1                                    |                                       | C1                             |                                       | C1                                    |
| Movies collected                                 | 11,695                                |                                       | 15,953                                |           | 13,710                                |                                       | 9,325                          |                                       | 12,142                                |
| Initial particle (no.)                           | 4,439,065                             |                                       | 7,261,156                             |           | 6,709,071                             |                                       | 1,466,331                      |                                       | 3,560,642                             |
| Final particle (no.)                             | 351,565                               | 215,132                               | 122,155                               | 13,857    | 485,905                               | 196,974                               | 10,667                         | 62,554                                | 124,721                               |
| Map resolution (Å)                               | 2.7                                   | 3.0                                   | 3.5                                   | 4.5       | 2.7                                   | 3.1                                   | 6.8                            | 3.32                                  | 3.4                                   |
| FSC threshold                                    | (0.143)                               | (0.143)                               | (0.143)                               | (0.143)   | (0.143)                               | (0.143)                               | (0.143)                        | (0.143)                               | (0.143)                               |
| <b>Refinement</b>                                |                                       |                                       |                                       |           |                                       |                                       |                                |                                       |                                       |
| Initial model used (PDB code)                    | 6TTU, 1U6G                            | 6TTU, 1U6G, 1LDK                      | 6TTU, 1U6G, 1LDK                      |           | 6TTU, 1U6G, 1LDK                      | 6TTU, 1U6G, 1LDK                      |                                | 6TTU, 1U6G, 1LDK                      | 6TTU, 1U6G, 1LDK                      |
| Model resolution (Å)                             | 2.7                                   | 3.0                                   | 3.5                                   |           | 2.7                                   | 3.1                                   |                                | 3.32                                  | 3.4                                   |
| FSC threshold                                    | (0.143)                               | (0.143)                               | (0.143)                               |           | (0.143)                               | (0.143)                               |                                | (0.143)                               | (0.143)                               |
| Map sharpening <i>B</i> factor (Å <sup>2</sup> ) | Deep-EMhancer (local <i>B</i> factor) | Deep-EMhancer (local <i>B</i> factor) | Deep-EMhancer (local <i>B</i> factor) |           | Deep-EMhancer (local <i>B</i> factor) | Deep-EMhancer (local <i>B</i> factor) |                                | Deep-EMhancer (local <i>B</i> factor) | Deep-EMhancer (local <i>B</i> factor) |
| <u>Model composition</u>                         |                                       |                                       |                                       |           |                                       |                                       |                                |                                       |                                       |
| -Non-hydrogen atoms                              | 15124                                 | 18077                                 | 14784                                 |           | 18313                                 | 18156                                 |                                | 16905                                 | 13629                                 |
| -Protein residues                                | 1950                                  | 2395                                  | 2014                                  |           | 2417                                  | 2394                                  |                                | 2392                                  | 2001                                  |
| -Ligands                                         | 3                                     | 3                                     | 0                                     |           | 3                                     | 3                                     |                                | 3                                     | 0                                     |
| <u><i>B</i> factors (Å<sup>2</sup>)</u>          |                                       |                                       |                                       |           |                                       |                                       |                                |                                       |                                       |
| -Protein                                         | 60.63                                 | 72.13                                 | 81.54                                 |           | 68.98                                 | 65.06                                 |                                | 89.5                                  | 78.28                                 |
| -Ligand                                          | 84.74                                 | 77.15                                 | -                                     |           | 76.43                                 | 78.18                                 |                                | 86.92                                 | -                                     |
| <u>R.m.s. deviations</u>                         |                                       |                                       |                                       |           |                                       |                                       |                                |                                       |                                       |
| -Bond lengths (Å)                                | 0.002                                 | 0.002                                 | 0.003                                 |           | 0.003                                 | 0.003                                 |                                | 0.003                                 | 0.003                                 |
| -Bond angles (°)                                 | 0.520                                 | 0.500                                 | 0.536                                 |           | 0.507                                 | 0.519                                 |                                | 0.566                                 | 0.563                                 |
| <u>Validation</u>                                |                                       |                                       |                                       |           |                                       |                                       |                                |                                       |                                       |
| -MolProbity score                                | 1.22                                  | 1.26                                  | 1.46                                  |           | 1.20                                  | 1.22                                  |                                | 1.25                                  | 1.26                                  |
| -Clashscore                                      | 4.29                                  | 4.88                                  | 5.46                                  |           | 4.21                                  | 4.38                                  |                                | 4.76                                  | 4.9                                   |
| -Poor rotamers (%)                               | 0.06                                  | 0.05                                  | 0.07                                  |           | 0.00                                  | 0.00                                  |                                | 0.00                                  | 0.00                                  |
| <u>Ramachandran plot</u>                         |                                       |                                       |                                       |           |                                       |                                       |                                |                                       |                                       |
| -Favored (%)                                     | 97.98                                 | 97.97                                 | 97.06                                 |           | 98.33                                 | 98.31                                 |                                | 98.22                                 | 98.57                                 |
| -Allowed (%)                                     | 2.18                                  | 2.03                                  | 2.94                                  |           | 1.67                                  | 1.69                                  |                                | 1.78                                  | 1.43                                  |
| -Disallowed (%)                                  | 0.00                                  | 0.00                                  | 0.00                                  |           | 0.00                                  | 0.00                                  |                                | 0.00                                  | 0.00                                  |
