# Supplementary material for: Systemwide disassembly and assembly of SCF ubiquitin ligase complexes
Source: PubMed Central journal article supplement — Cell. 2023 Apr 27;186(9):1895–1911.e21. doi: 10.1016/j.cell.2023.02.035 (PMC10156175; doi:10.1016/j.cell.2023.02.035), 2023-04-27
Supplement: mmc3.pdf [file mmc3.pdf]

**Methods S1: Cryo-EM processing schematics, related to Figures 1-6**

# Processing Schematic 1

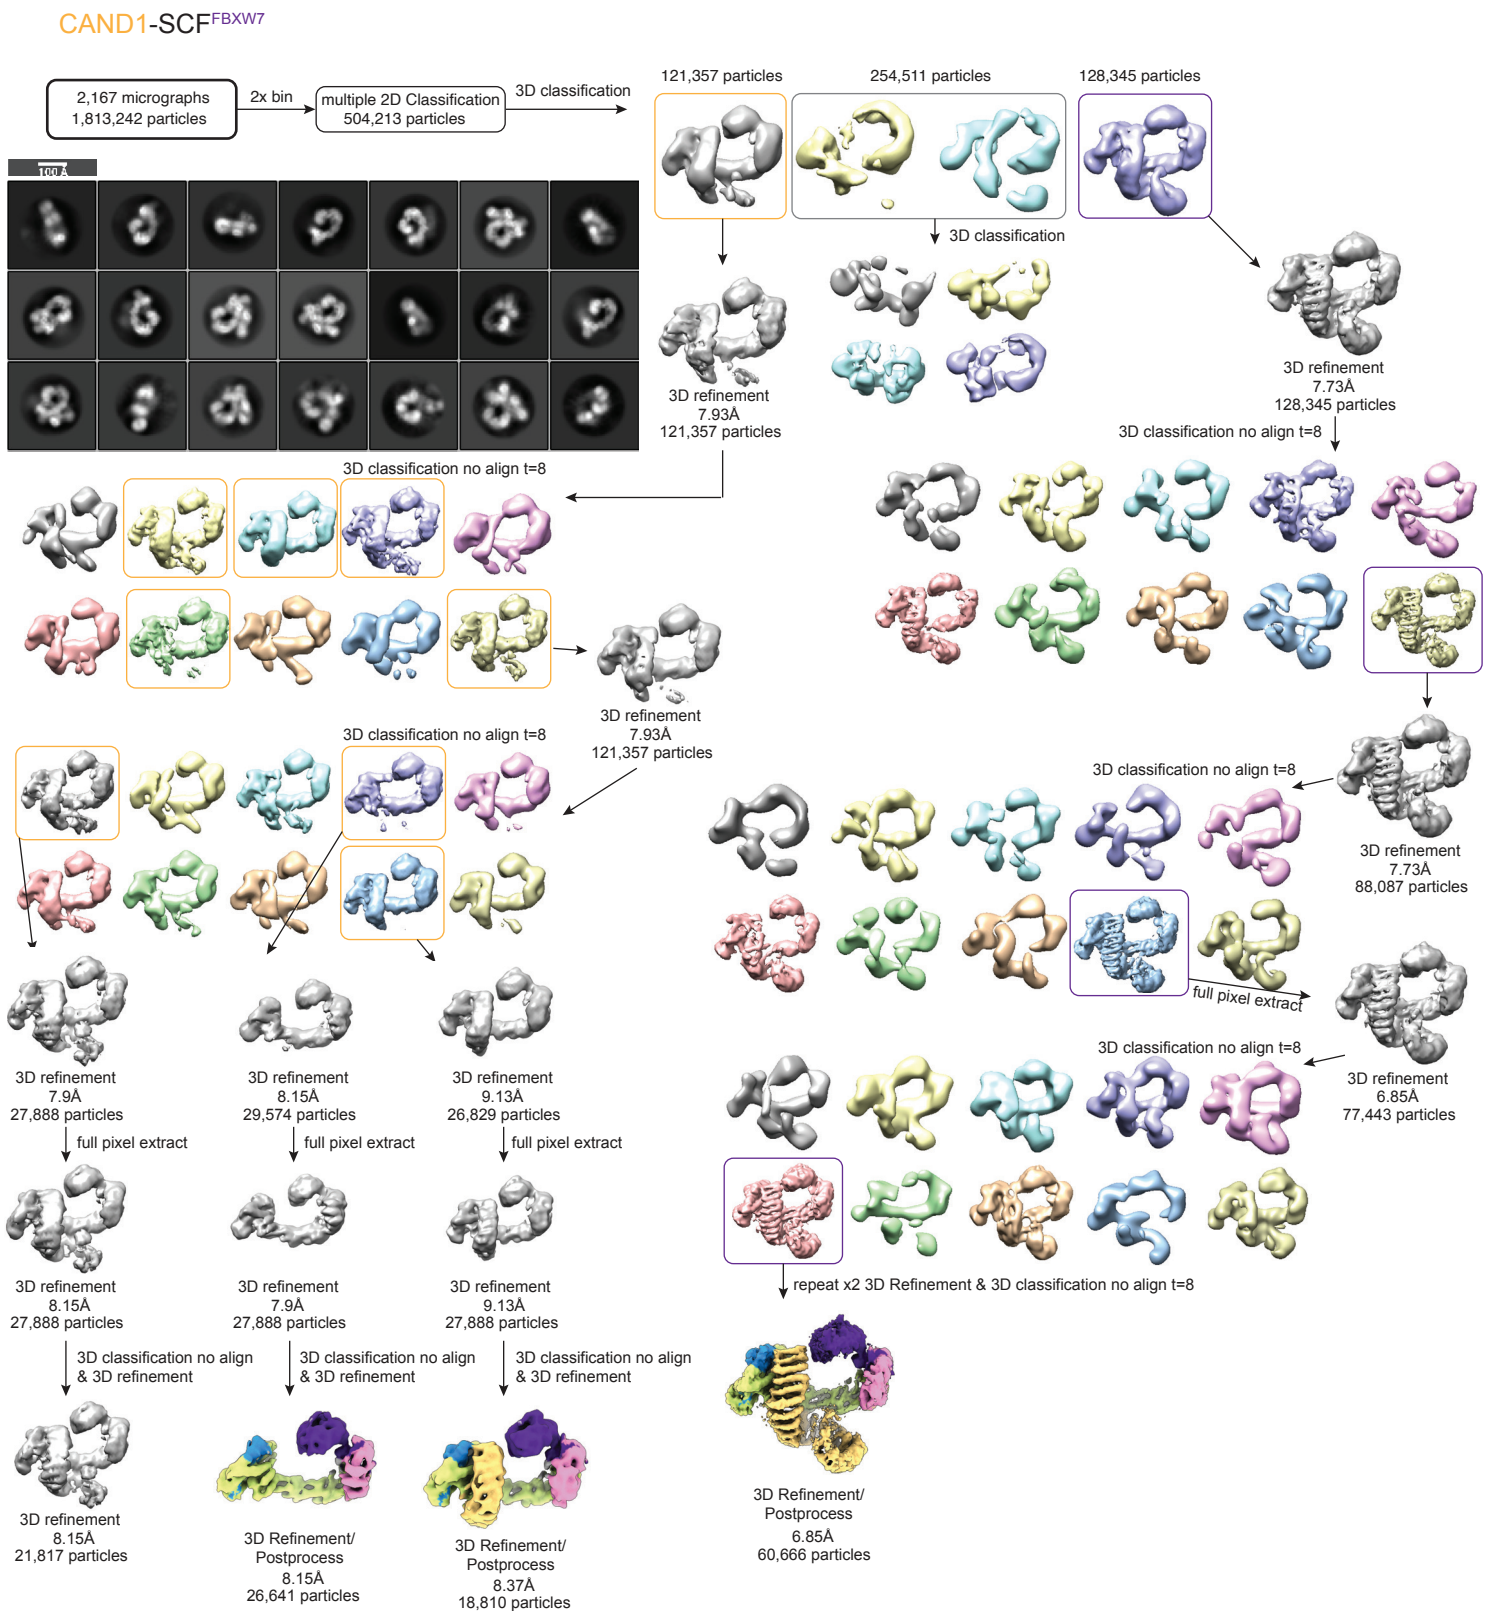

## Processing Schematic 1.

Cryo-EM processing schematic of CAND1-SCF<sup>FBXW7</sup> data collected from Glacios

## Processing Schematic 2

CAND1-SCF<sup>SKP2</sup>

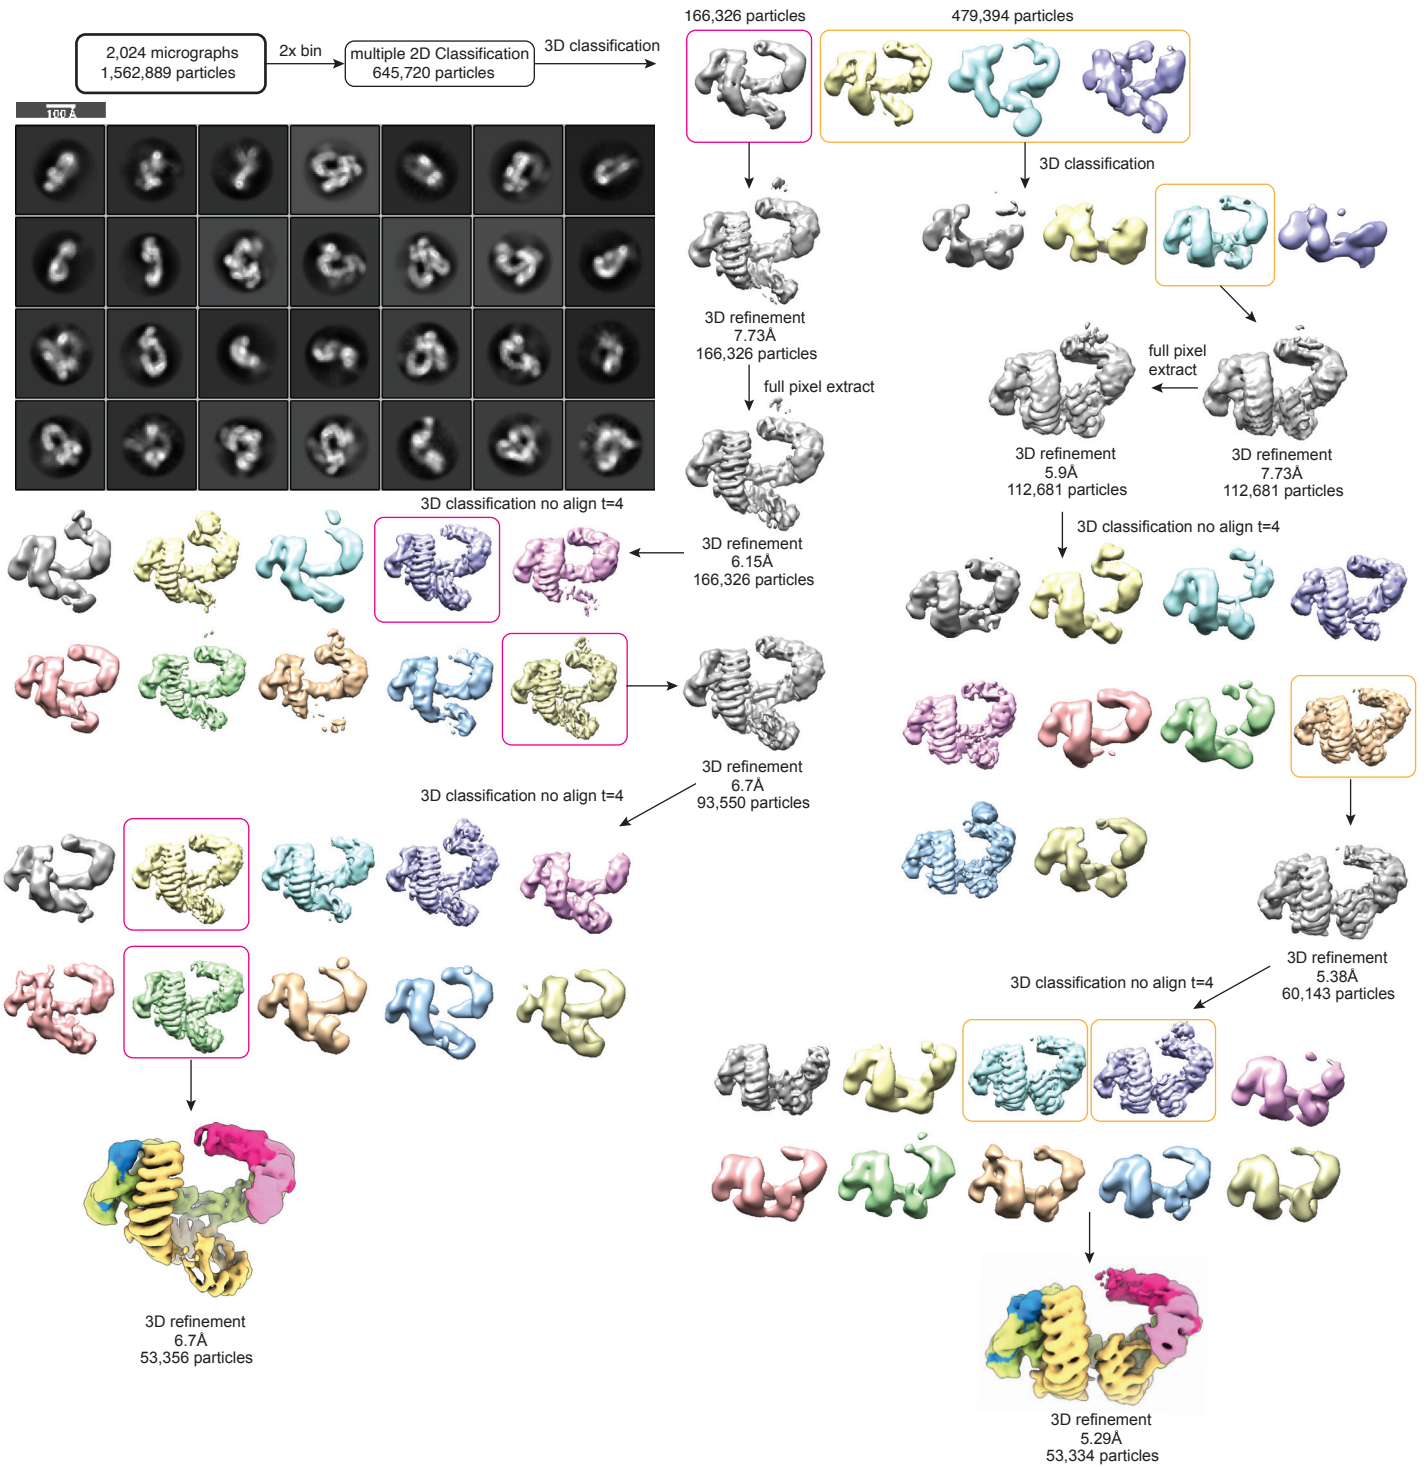

### Processing Schematic 2.

Cryo-EM processing schematic of CAND1-SCF<sup>SKP2</sup> data collected from Glacios

# Processing Schematic 3

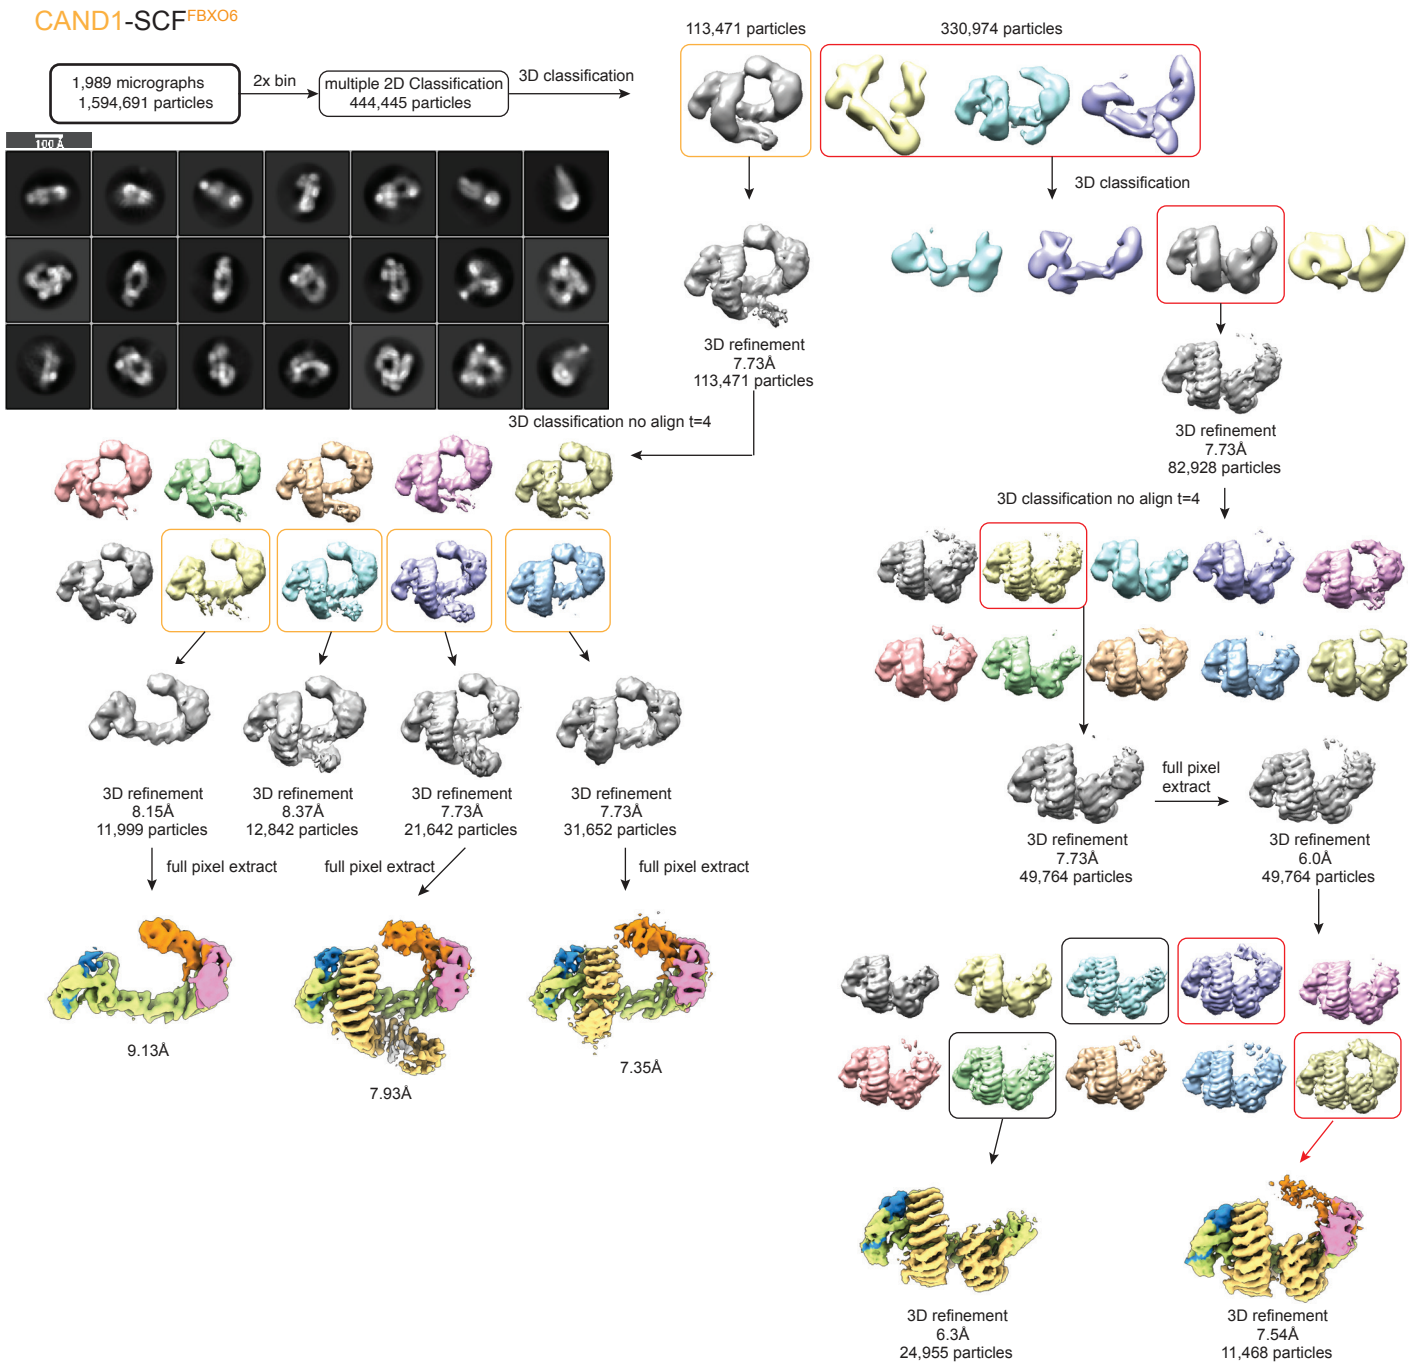

## Processing Schematic 3.

Cryo-EM processing schematic of CAND1-SCF<sup>FBXO6</sup> data collected from Glacios



## Processing Schematic 4

CAND1(2X)-SCF<sup>FBXW7</sup>

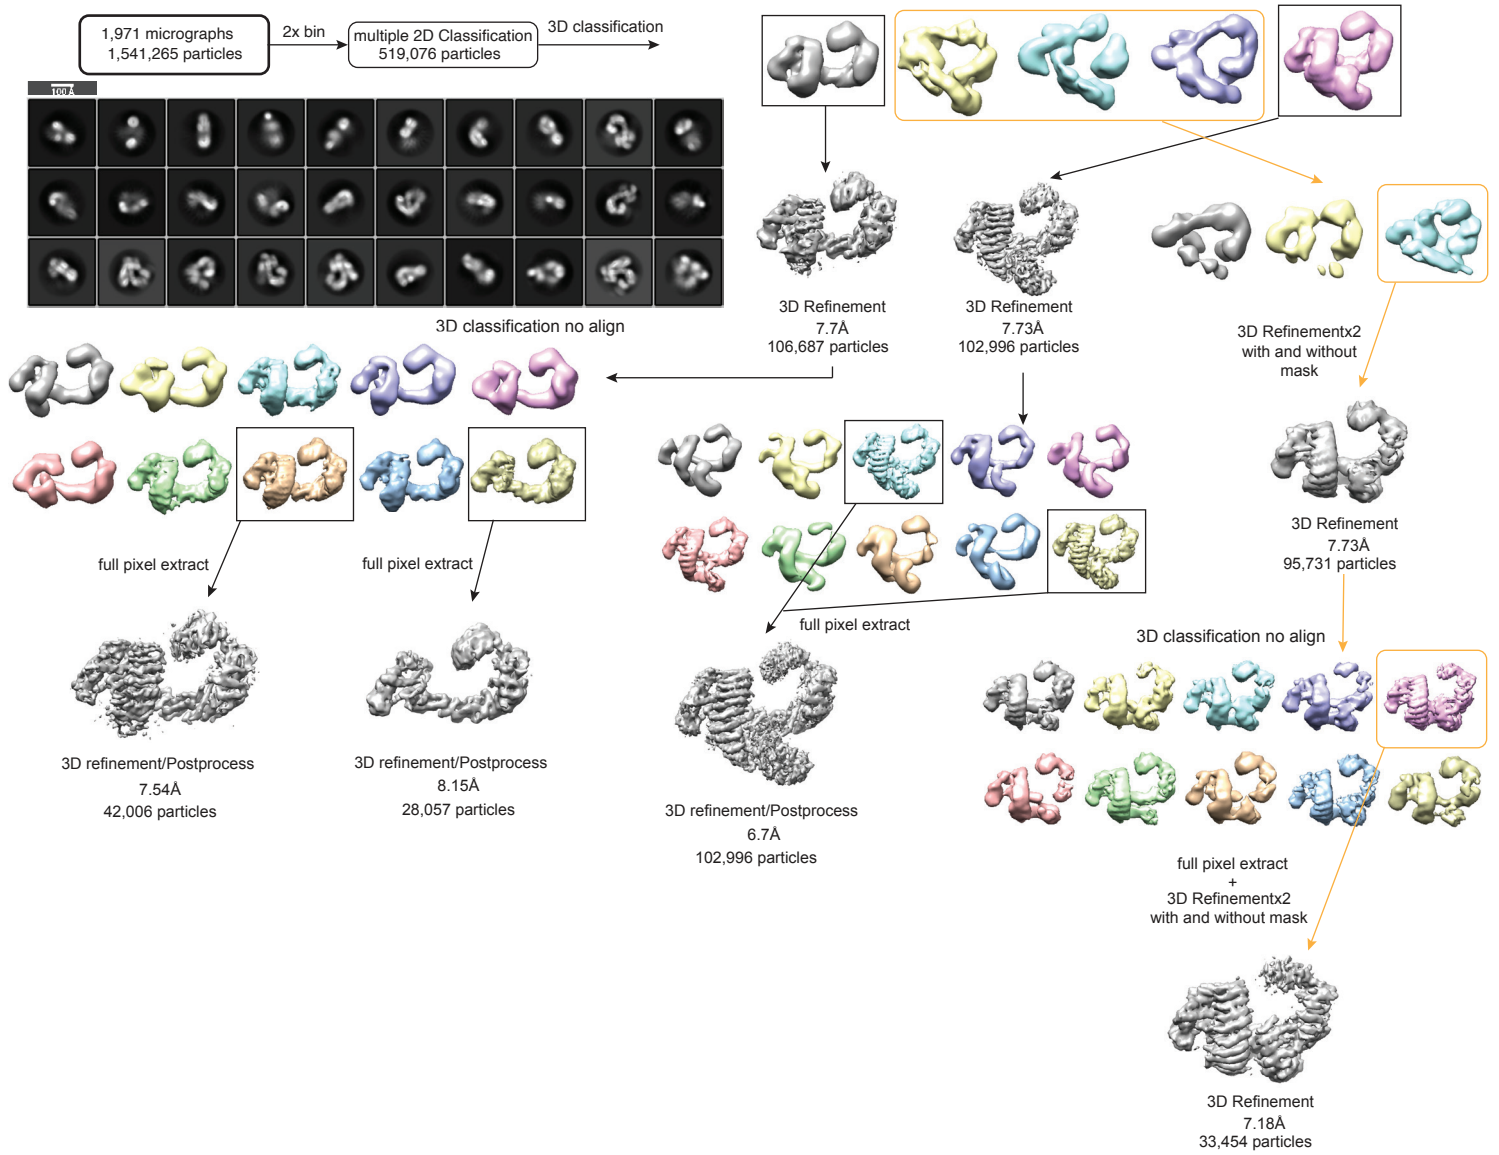

## Processing Schematic 4.

Cryo-EM processing schematic of CAND1(2X)-SCF<sup>FBXW7</sup> data collected from Glacios

# Processing Schematic 5

CAND1-SCF<sup>FBXW7</sup>

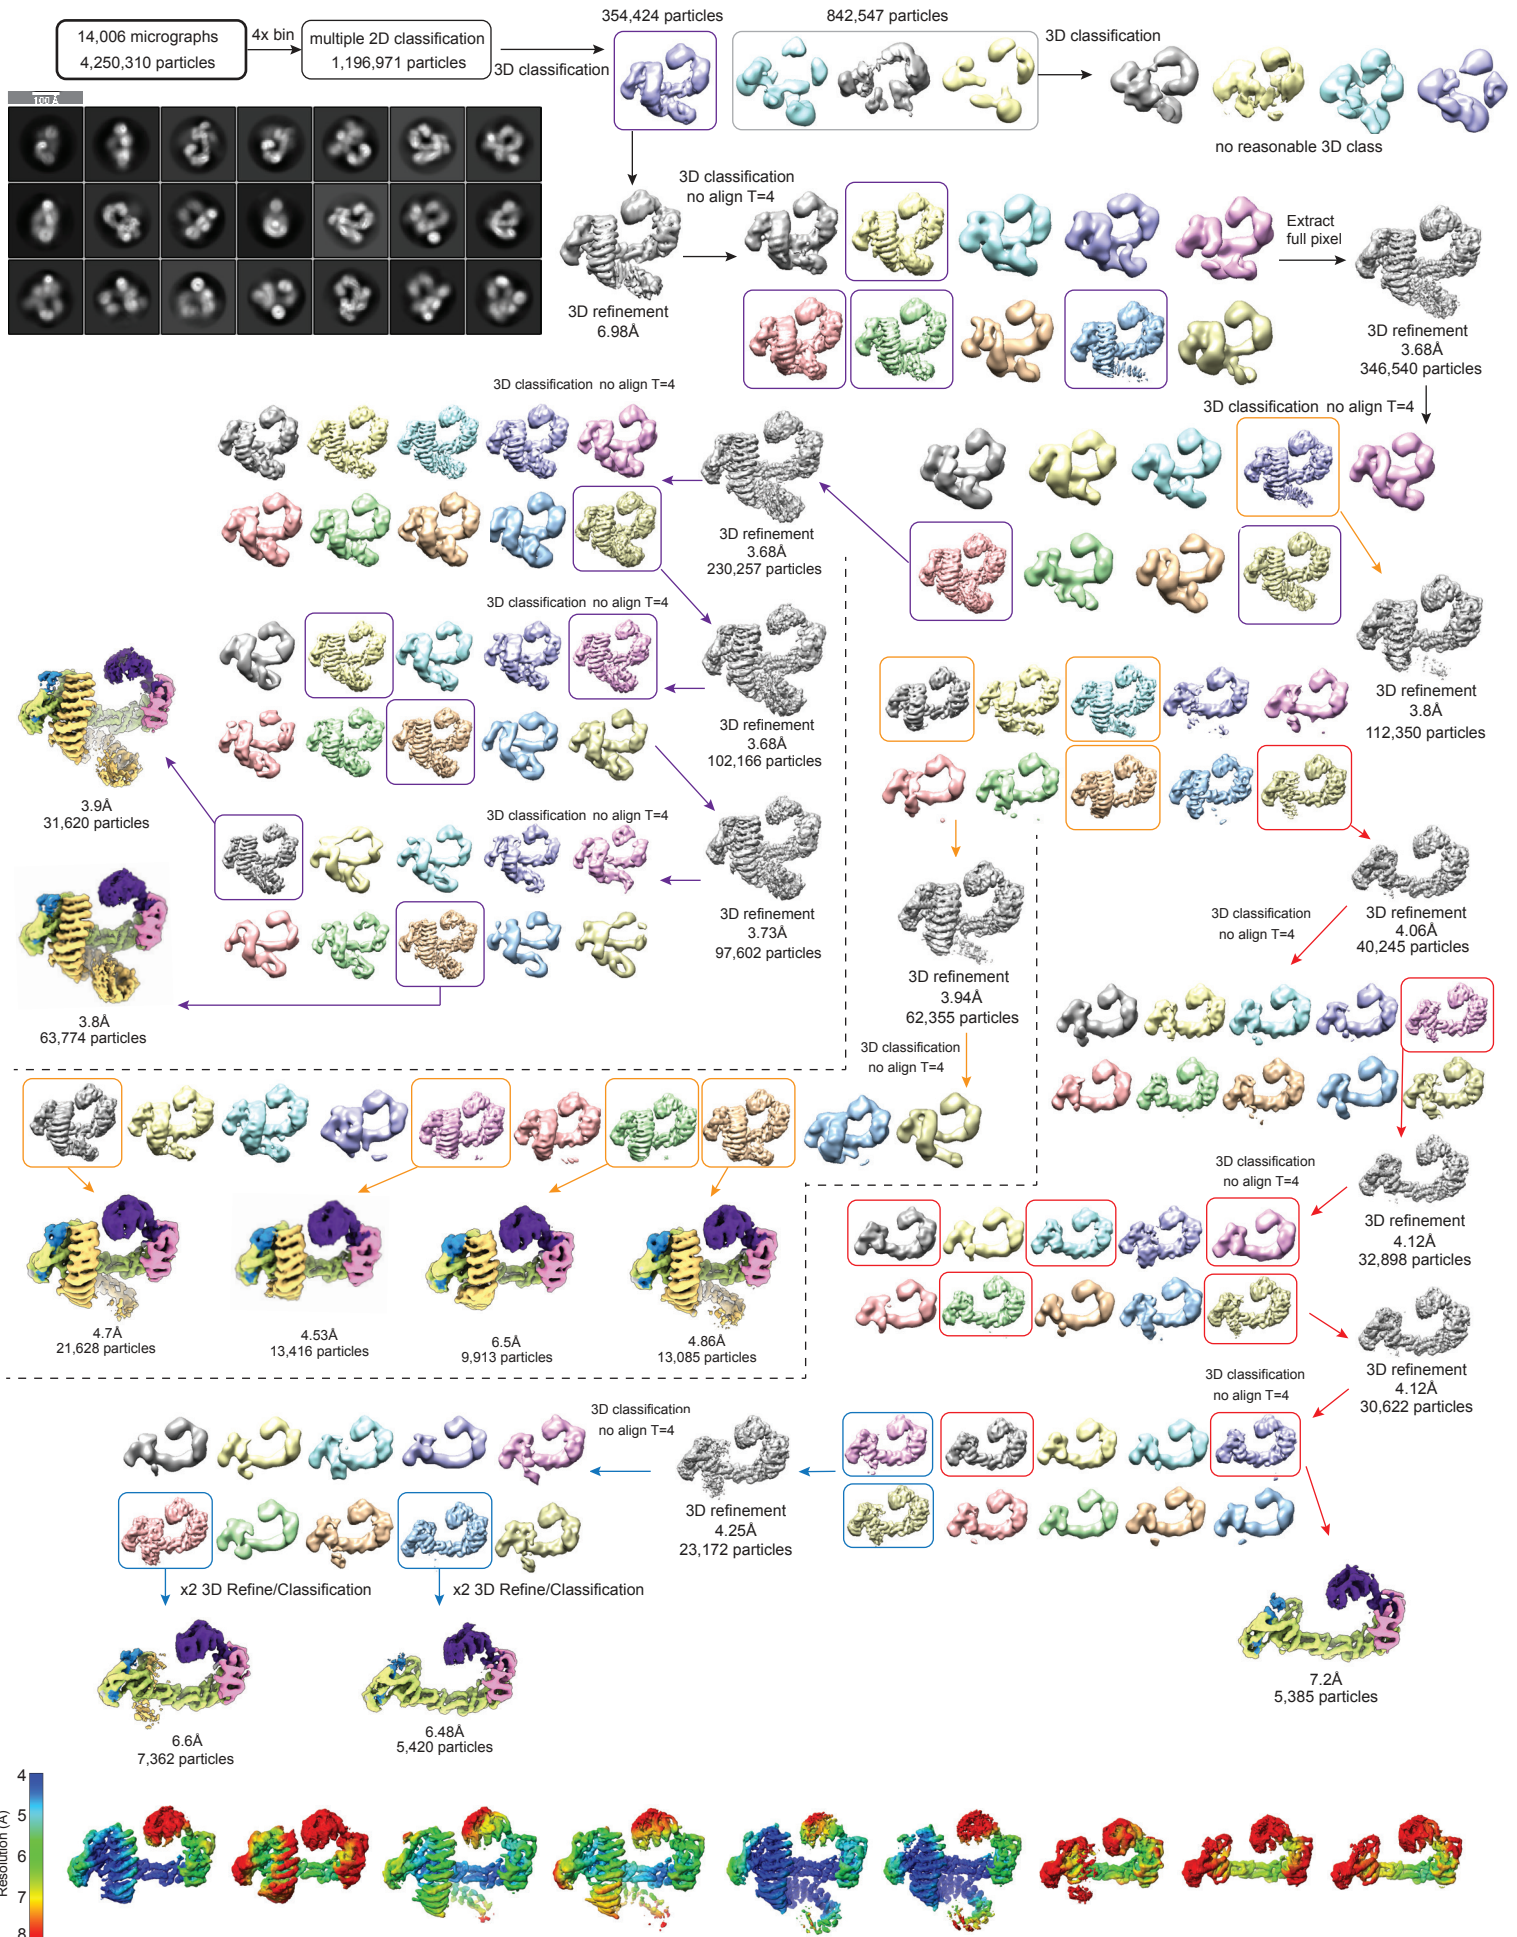

## Processing Schematic 5.

Cryo-EM processing schematic of CAND1-SCF<sup>FBXW7</sup> data collected from Krios

## Processing Schematic 6

### CAND1-SCF<sup>FBXW7</sup> (SKP1 $\Delta\Delta$ )

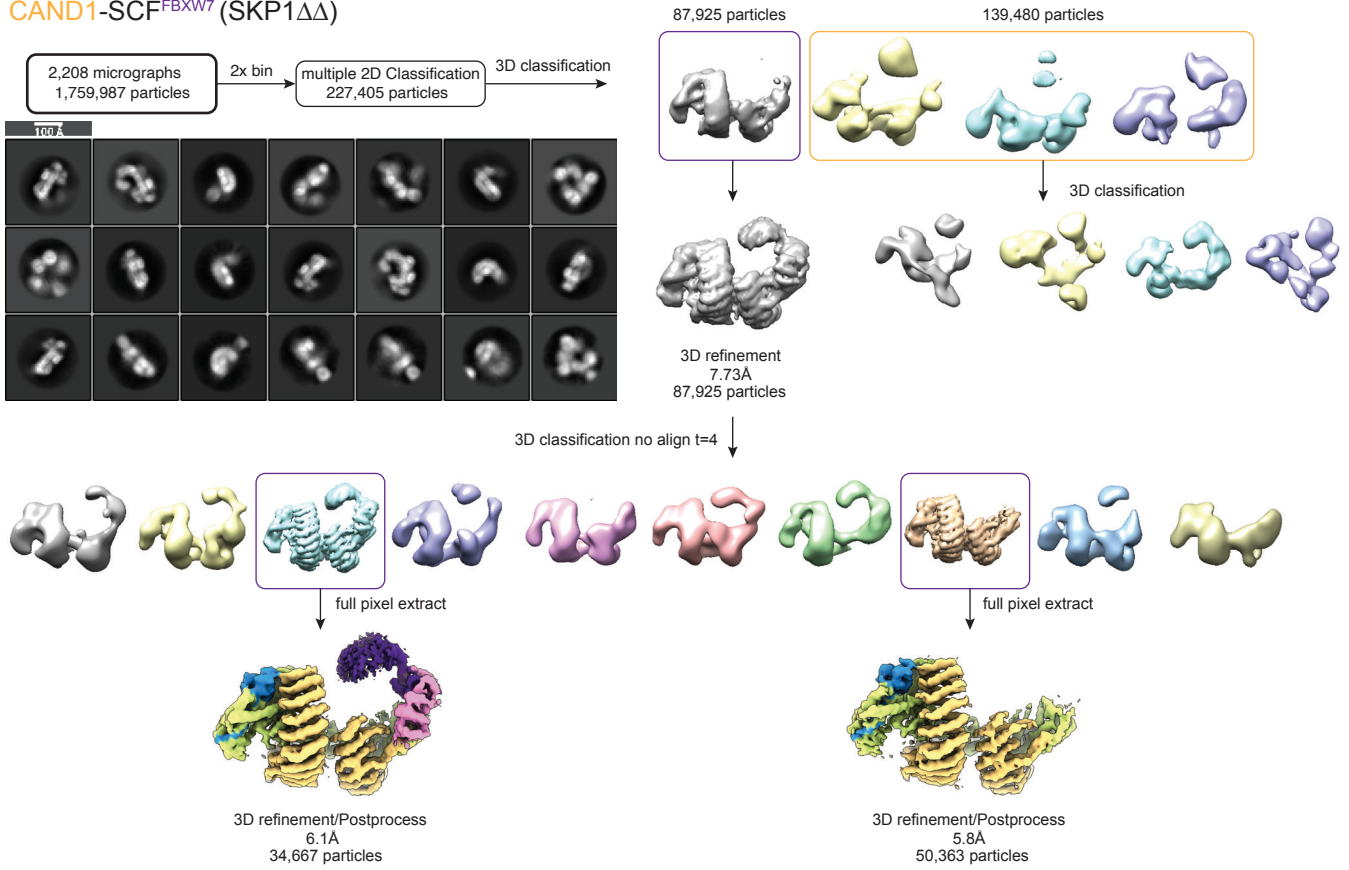

## Processing Schematic 6.

Cryo-EM processing schematic of CAND1-SCF<sup>FBXW7</sup> (SKP1 $\Delta\Delta$ ) data collected from Glacios



# Processing Schematic 7

CAND1-SCF<sup>SKP2</sup>

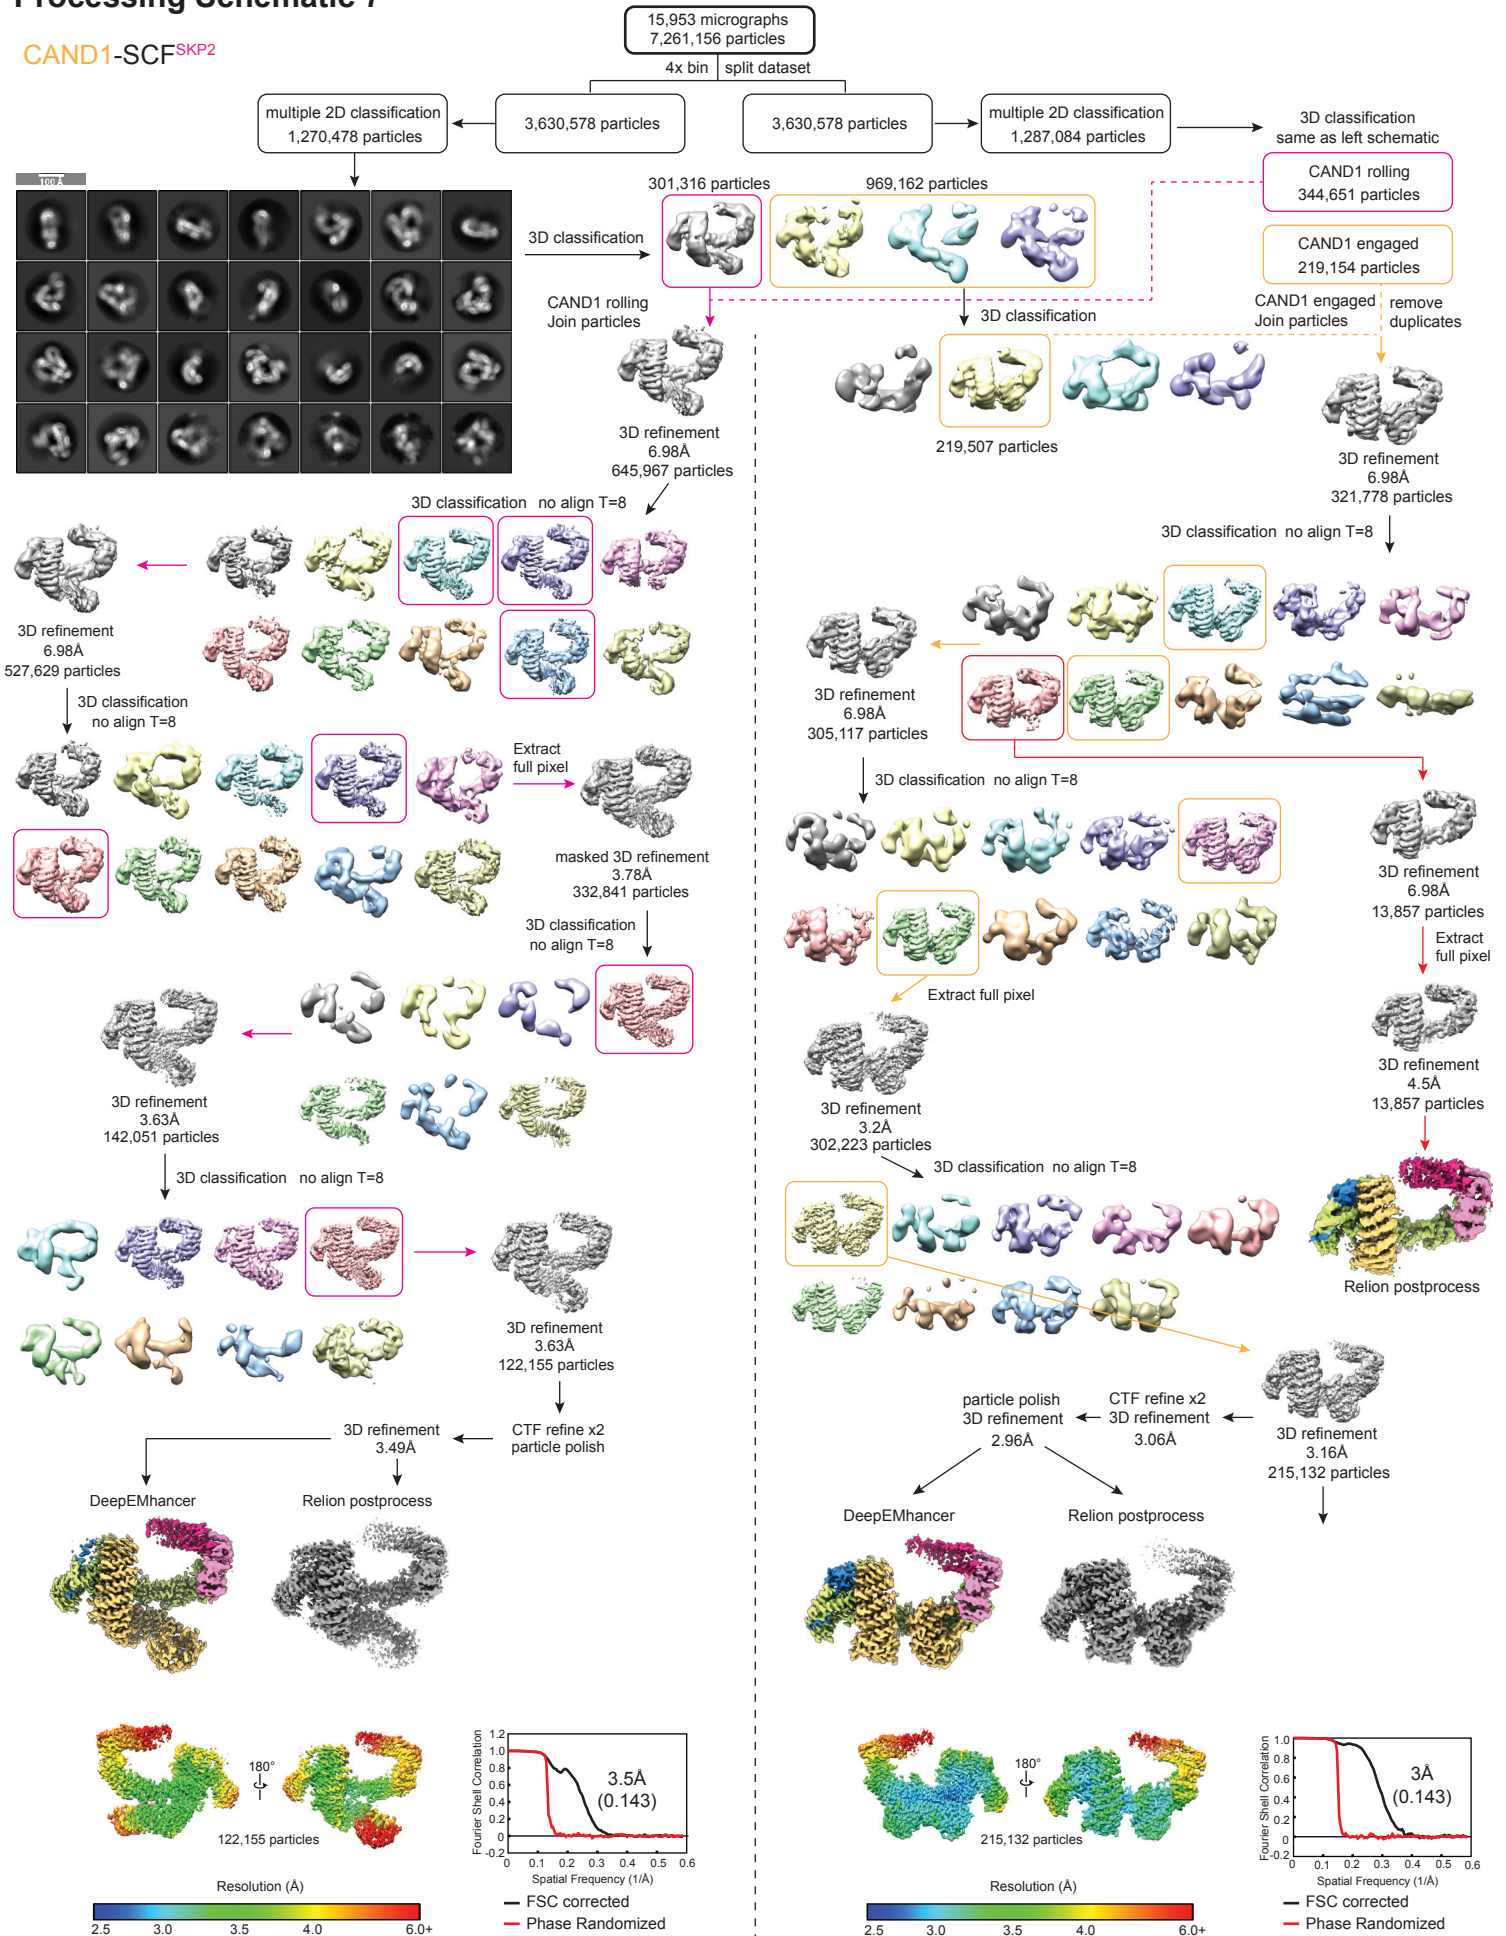

## Processing Schematic 7.

Cryo-EM processing schematic of CAND1-SCF<sup>SKP2</sup> data collected from Krios



# Processing Schematic 8

CAND1-SCF<sup>SKP2</sup> (SKP1ΔΔ)

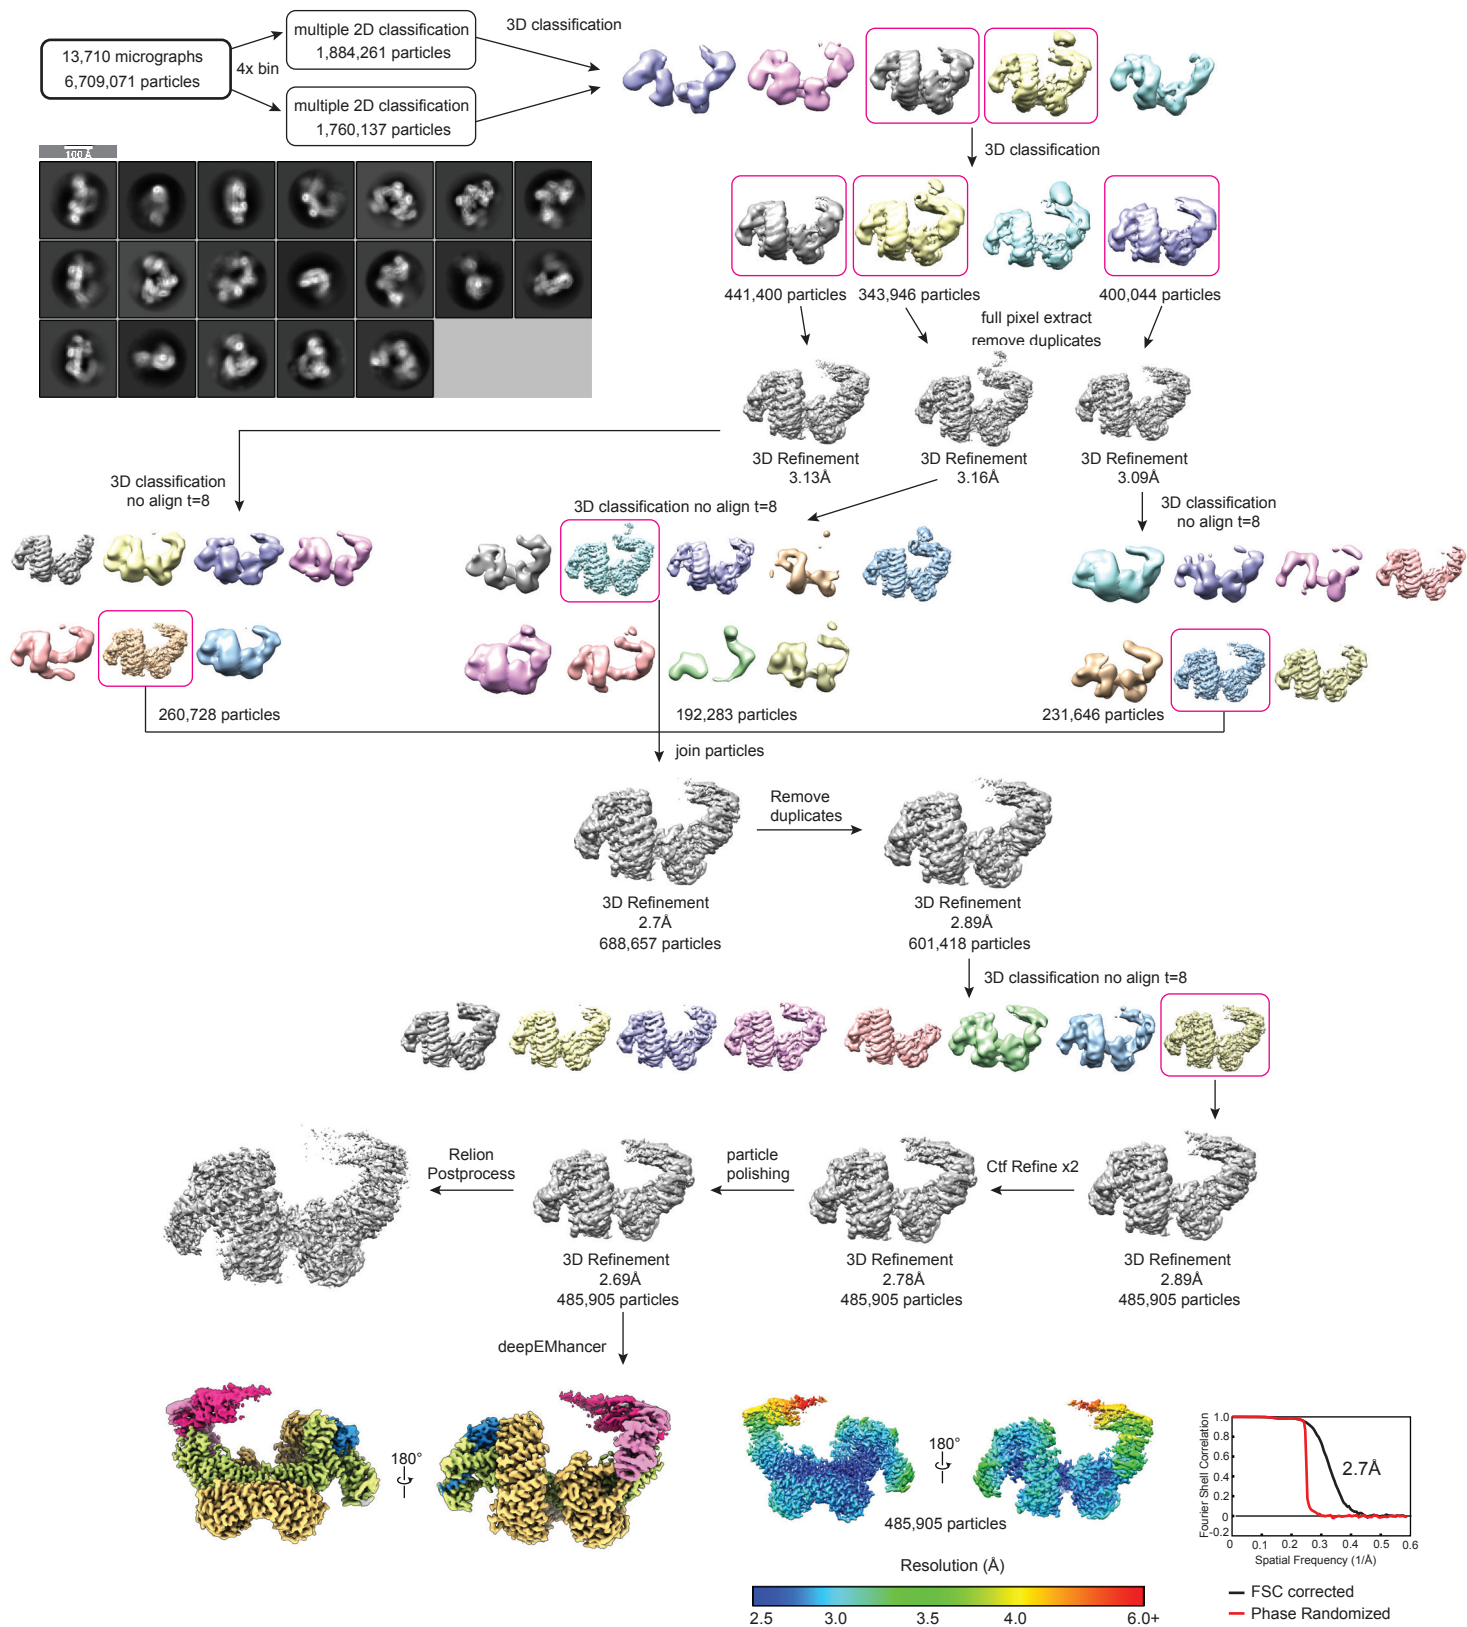

## Processing Schematic 8.

Cryo-EM processing schematic of CAND1-SCF<sup>SKP2</sup> (SKP1ΔΔ) data collected from Krios

# Processing Schematic 9

CAND1  $\Delta\beta$ -hairpin-SCF<sup>SKP2</sup>

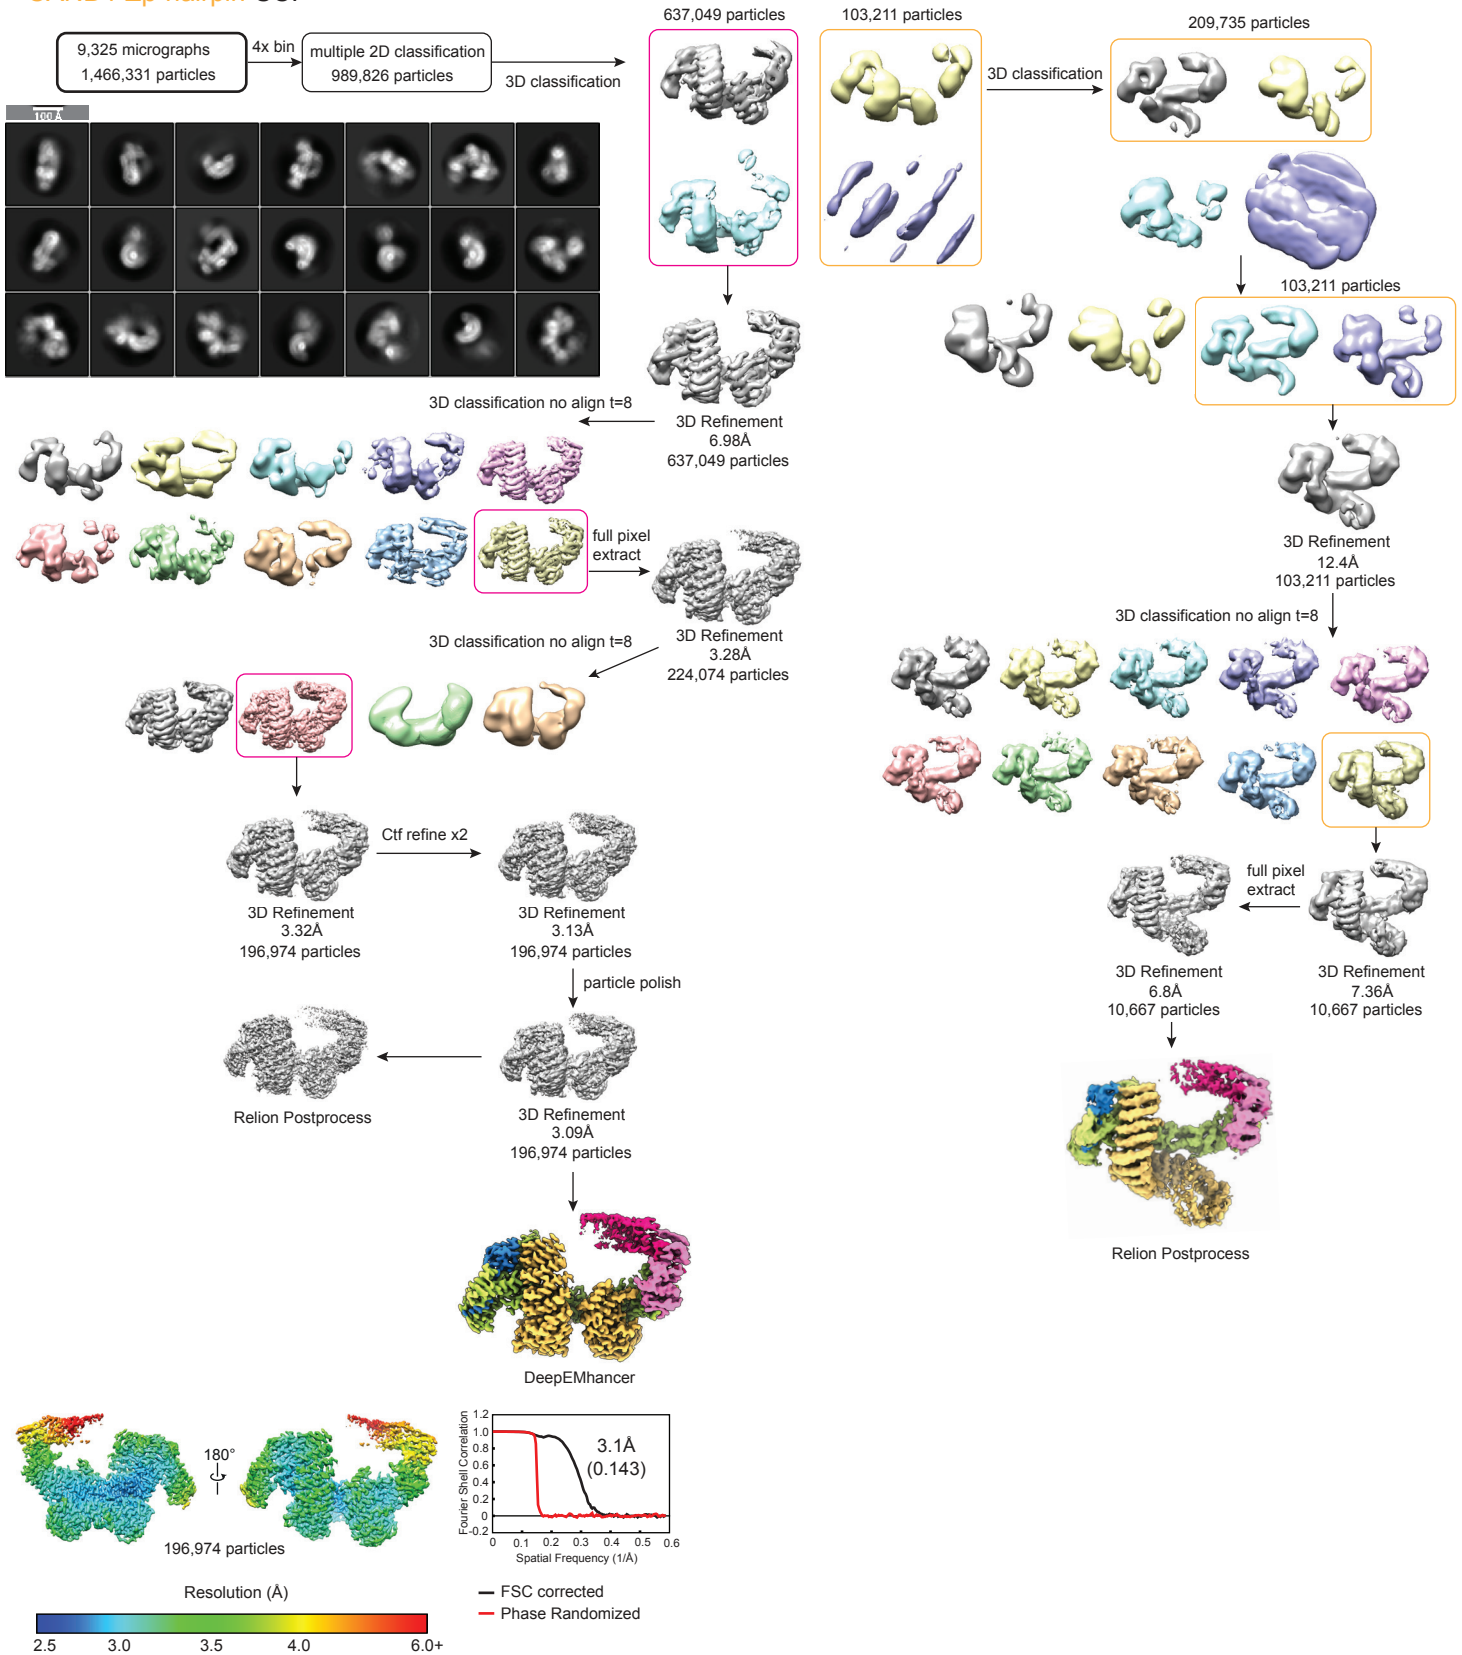

## Processing Schematic 9.

Cryo-EM processing schematic of CAND1 $\Delta\beta$ -hairpin-SCF<sup>SKP2</sup> data collected from Krios

# Processing Schematic 10

CAND1 $\Delta$  $\beta$ -hairpin-SCF<sup>FBXW7</sup>

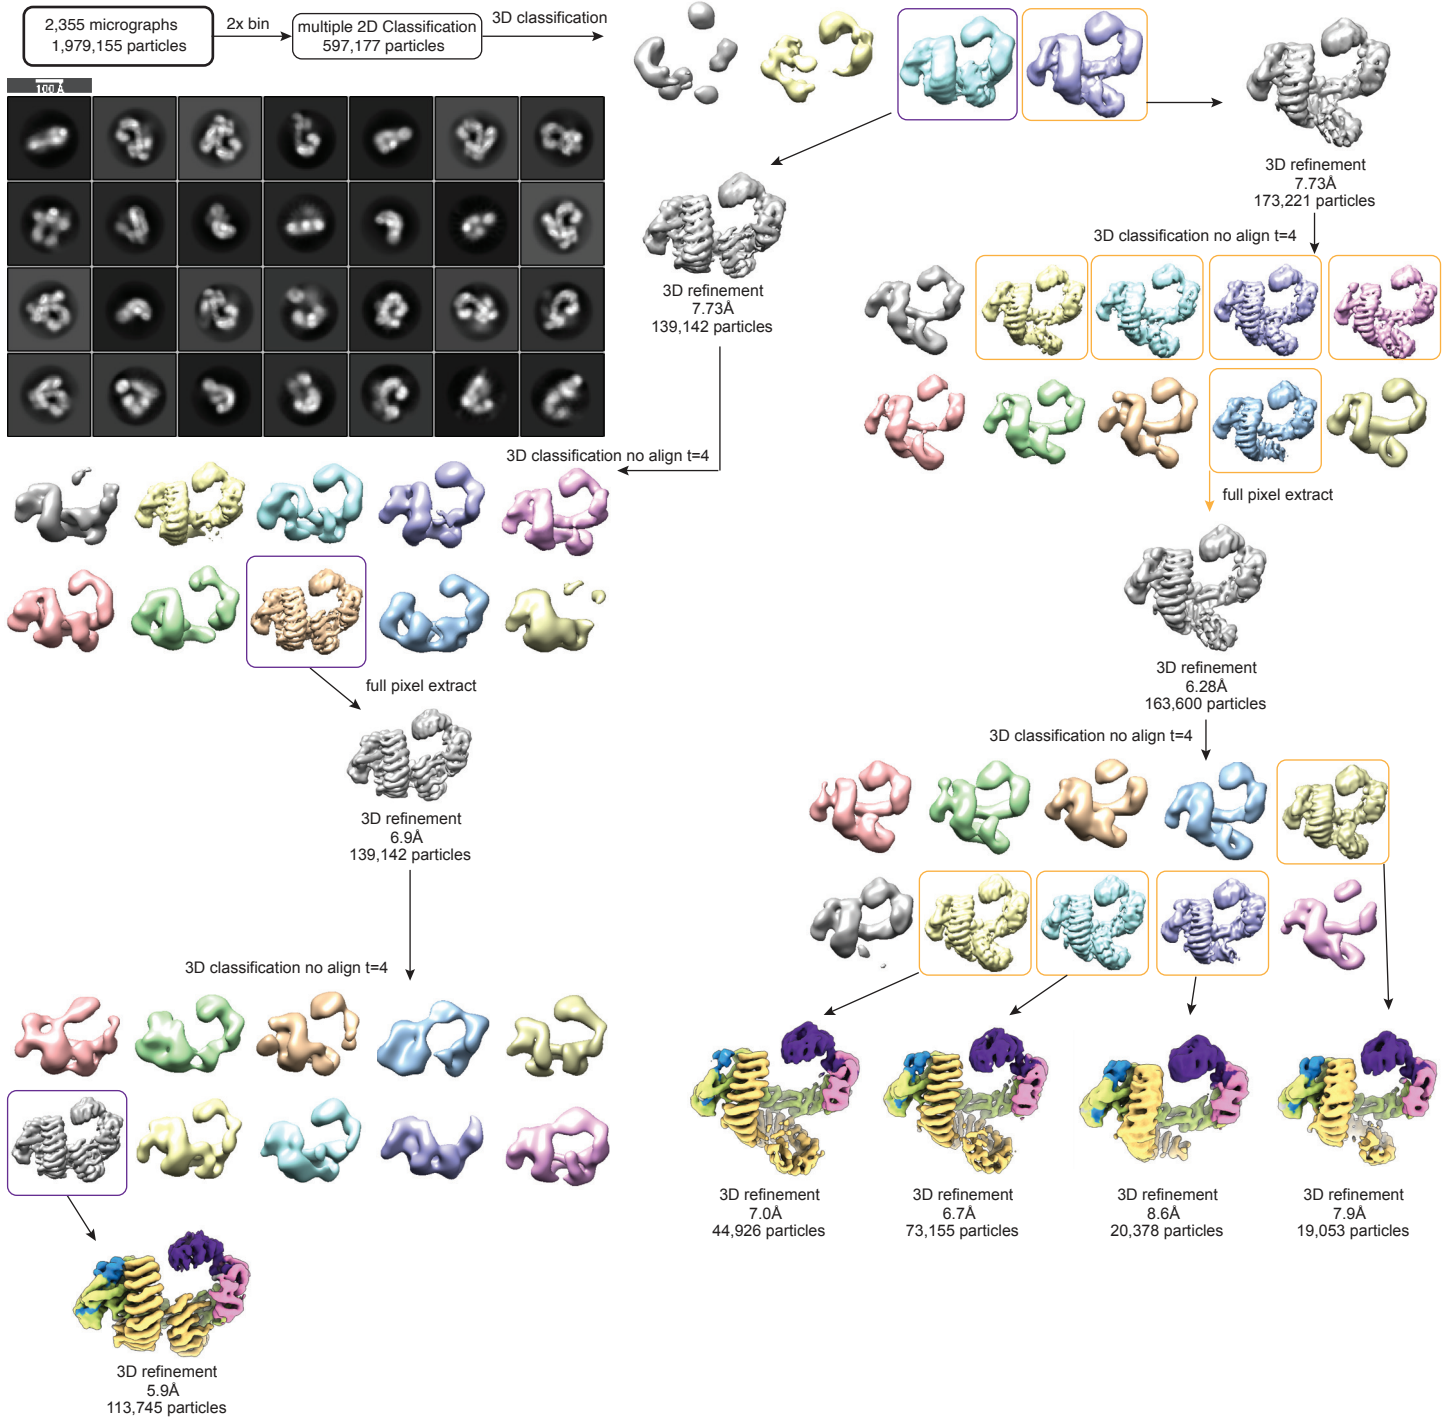

## Processing Schematic 10.

Cryo-EM processing schematic of CAND1 $\Delta$   $\beta$ -hairpin-SCF<sup>FBXW7</sup> data collected from Glacios



# Processing Schematic 11

CAND1-CUL1-RBX1

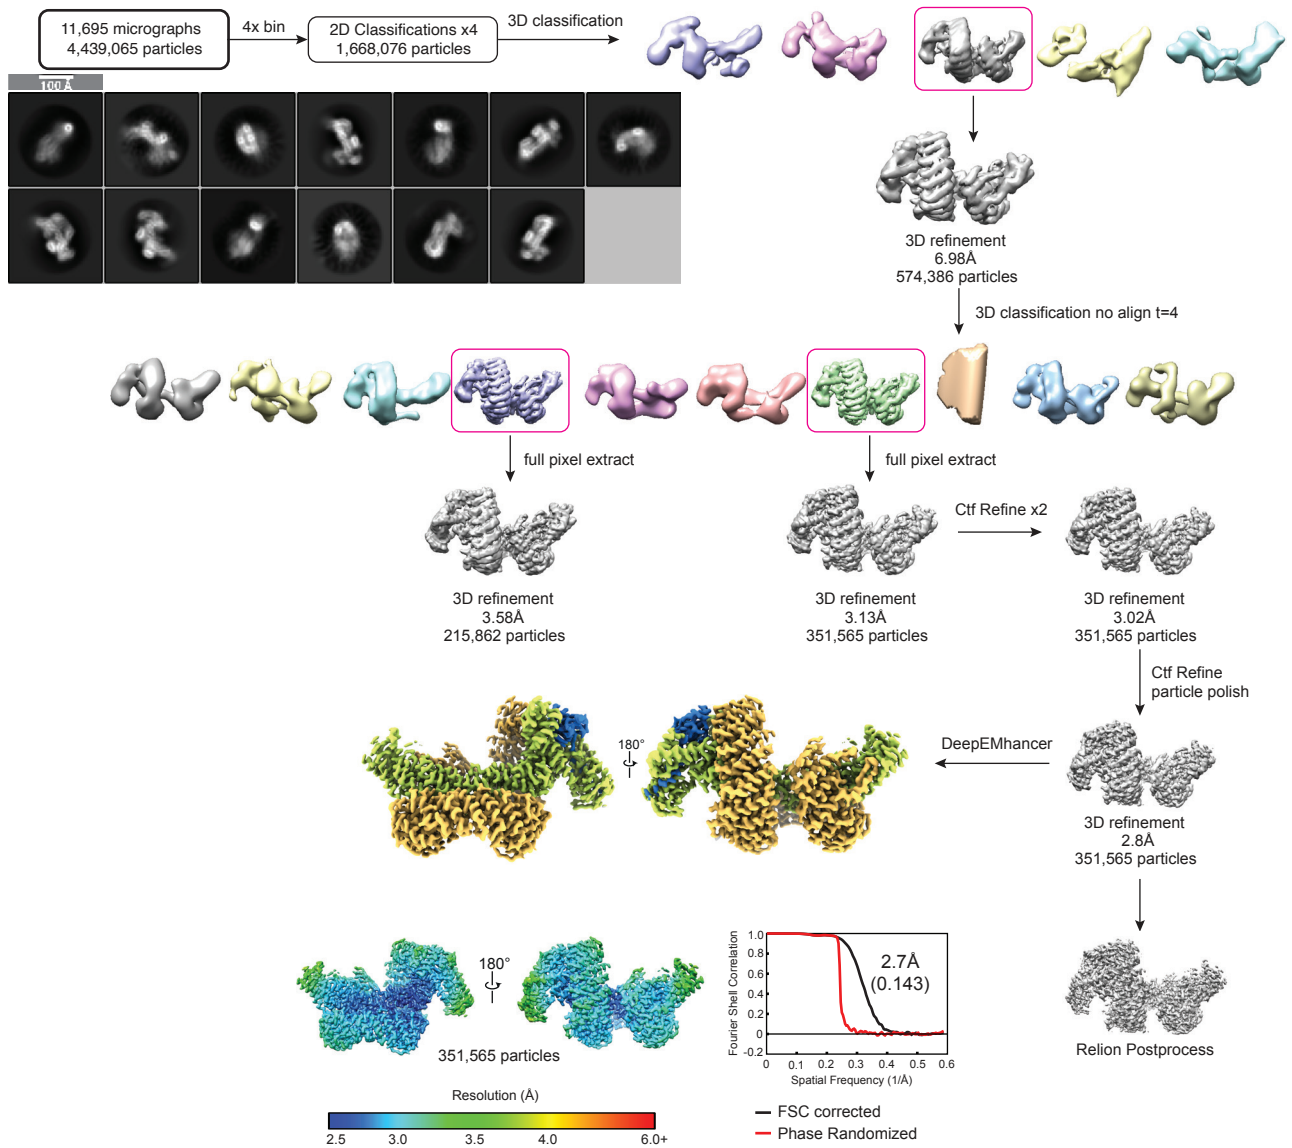

## Processing Schematic 11.

Cryo-EM processing schematic of CAND1-CUL1-RBX1 data collected from Krios



# Processing Schematic 12

CAND1  $\beta$ -hairpin+-SCF<sup>SKP2</sup>

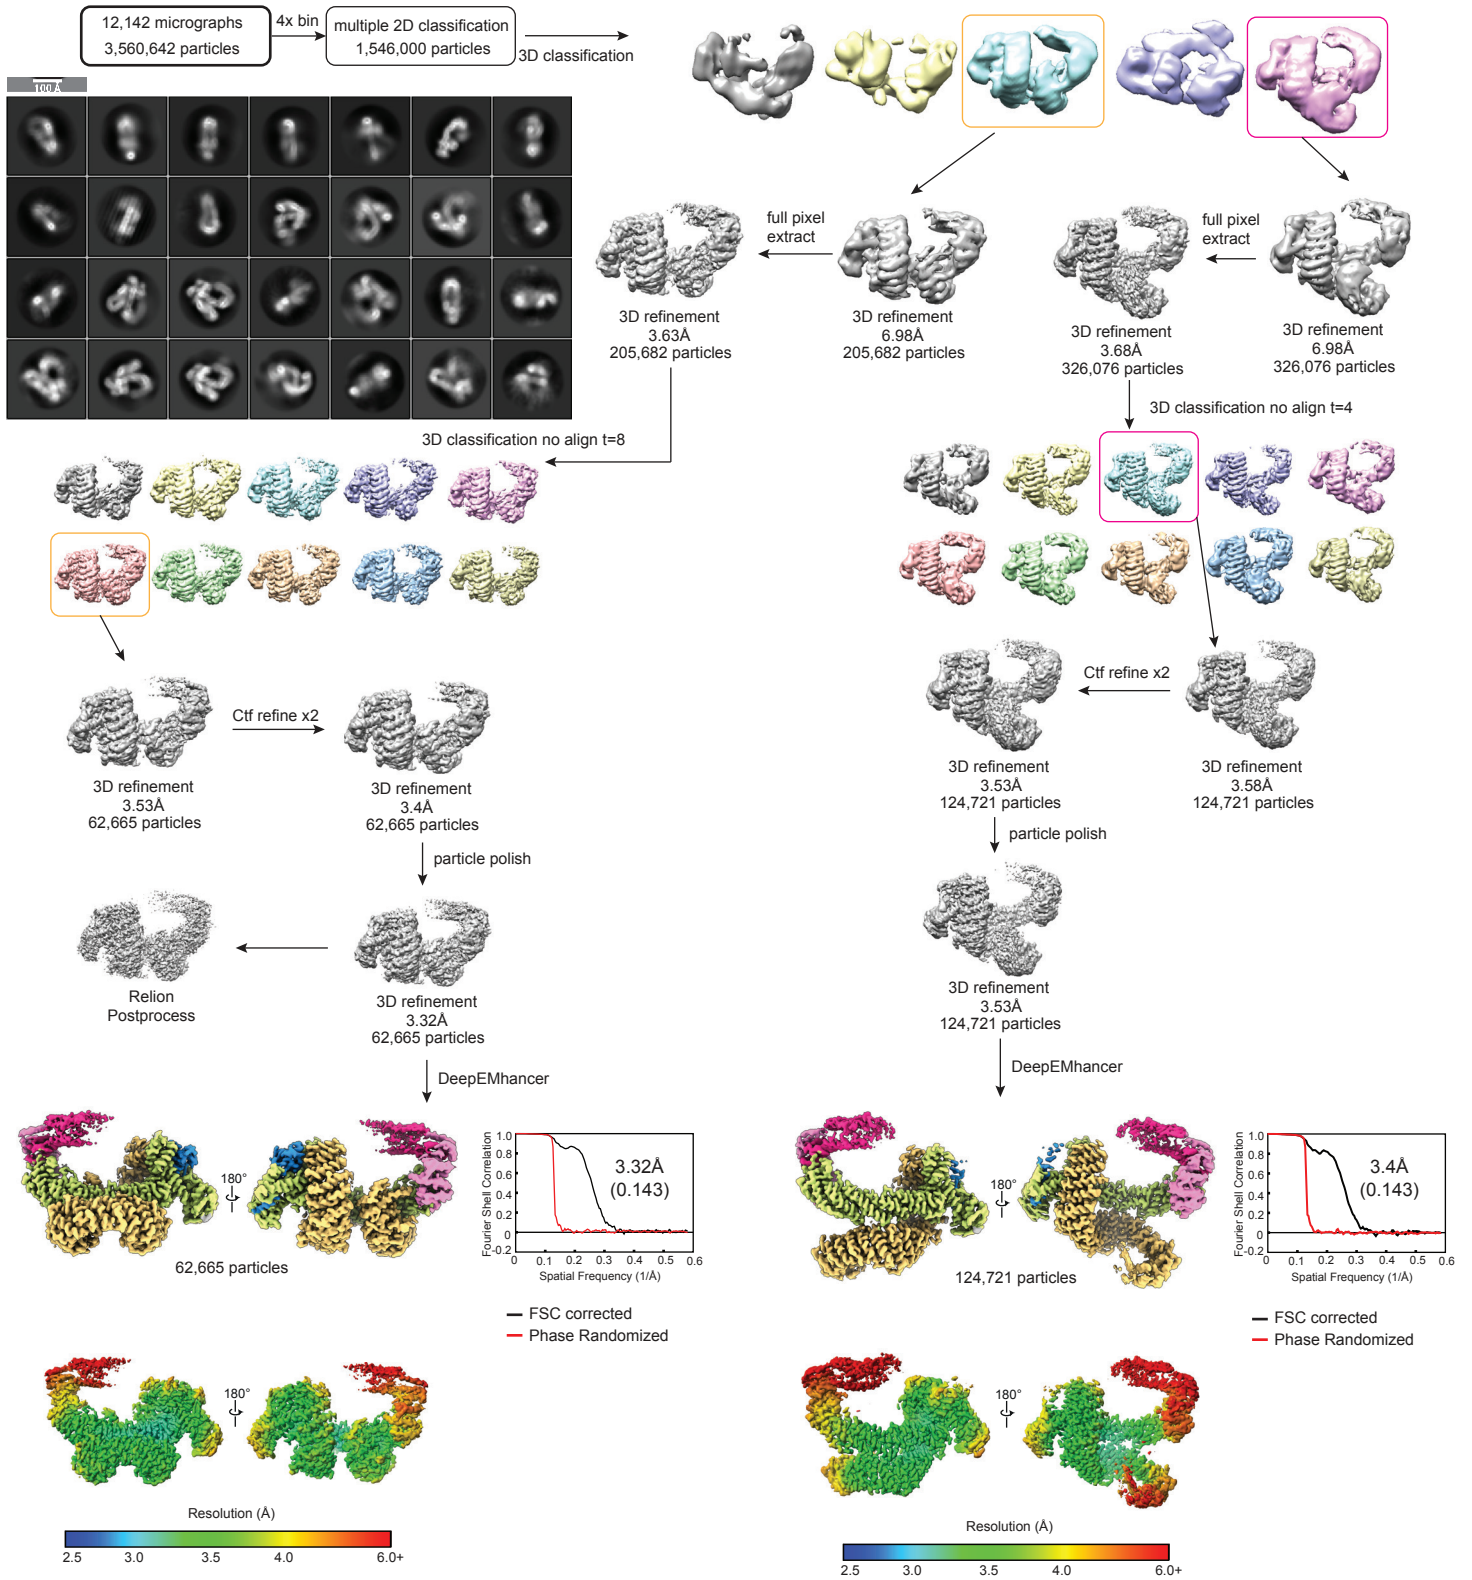

## Processing Schematic 12.

Cryo-EM processing schematic of CAND1  $\beta$ -hairpin+-SCF<sup>SKP2</sup> data collected from Krios

# Processing Schematic 13

CAND1  $\Delta\beta$ -hairpin-CUL1-RBX1

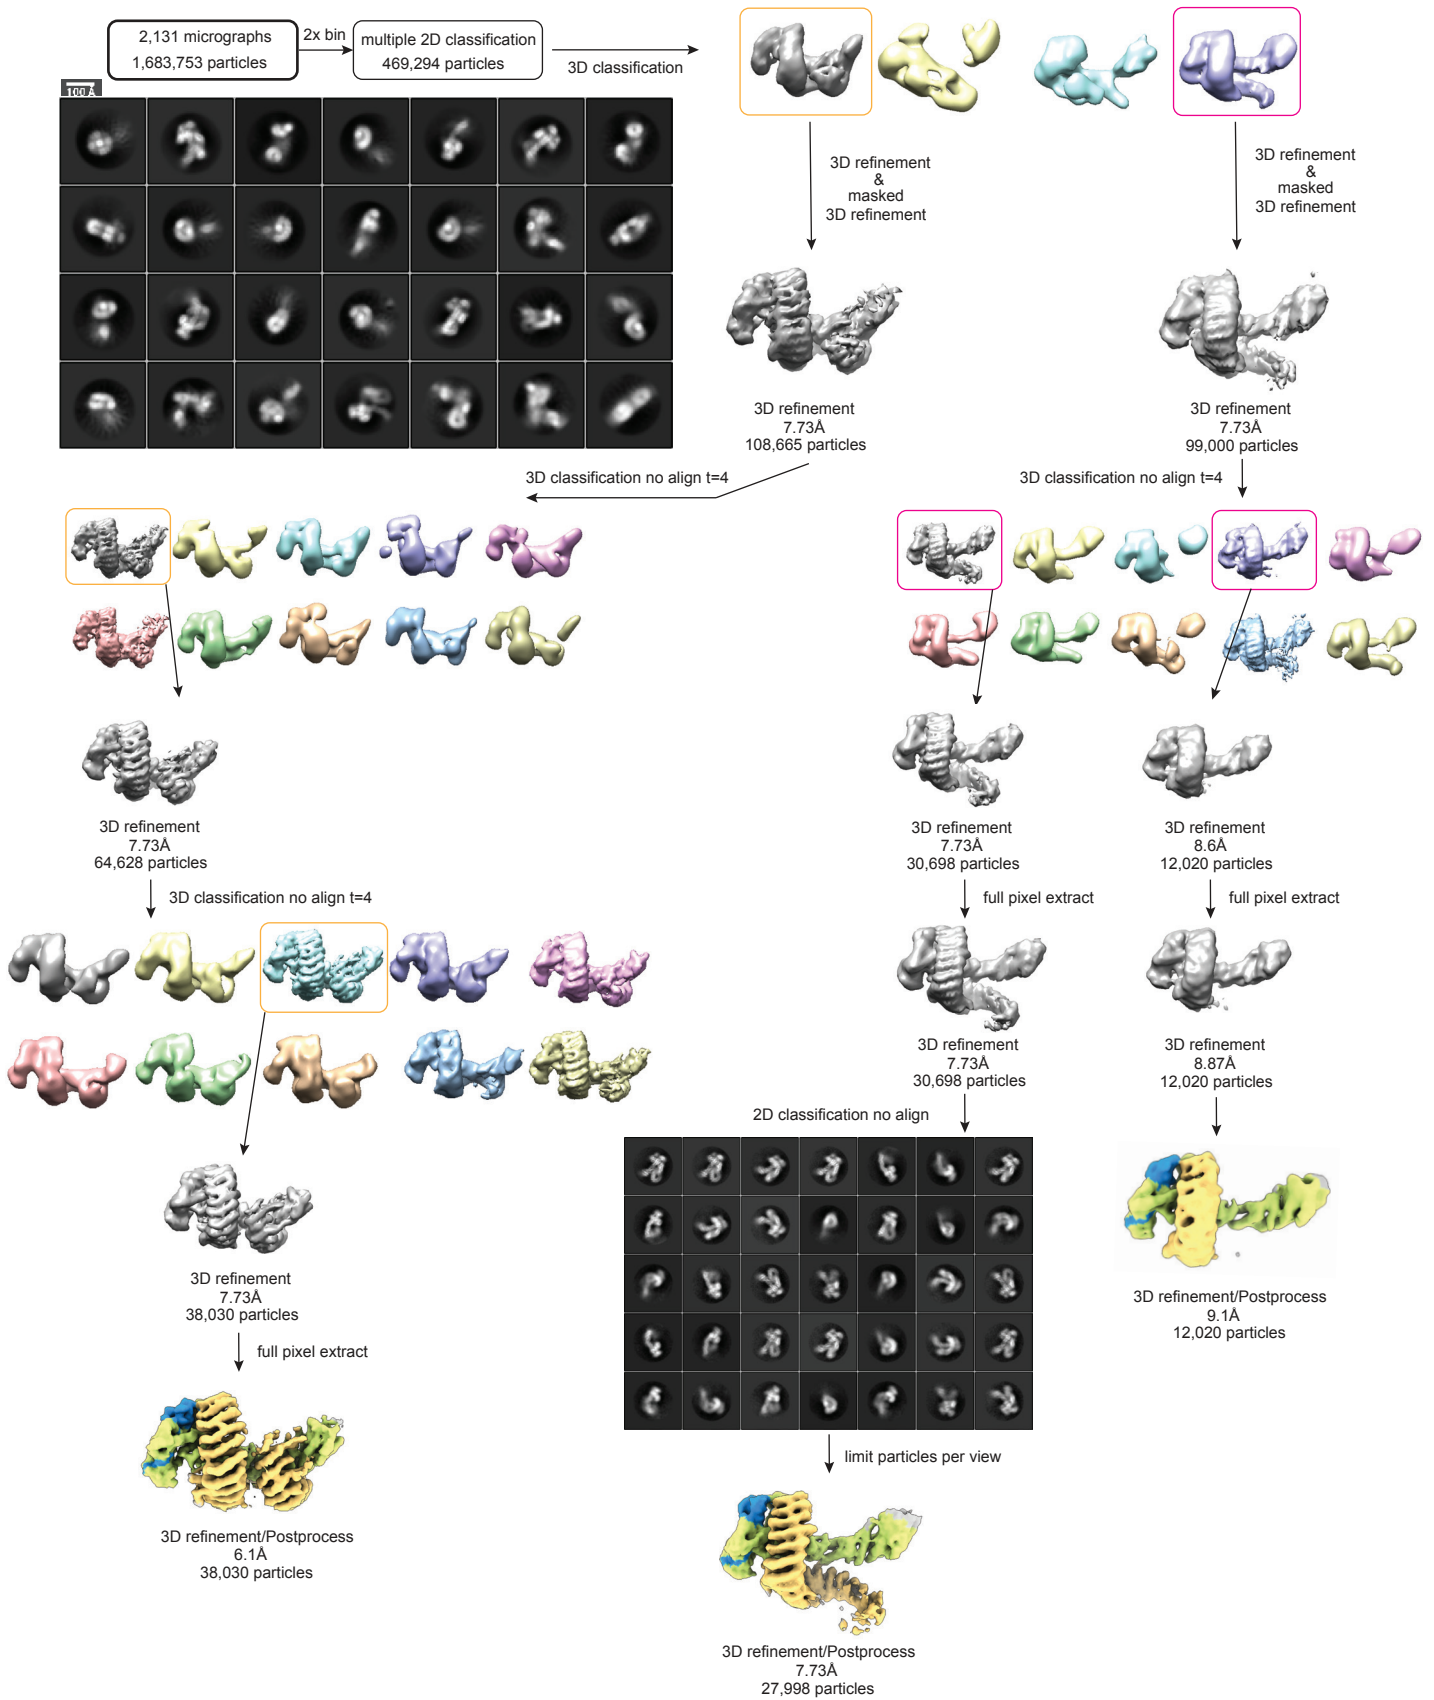

## Processing Schematic 13.

Cryo-EM processing schematic of CAND1 $\Delta\beta$ -hairpin-CUL1-RBX1 data collected from Glacios

## Processing Schematic 14

CAND1-SCF<sup>SKP2</sup>+ substrate complex (p27-CKSHS1-CyclinA-CDK2)

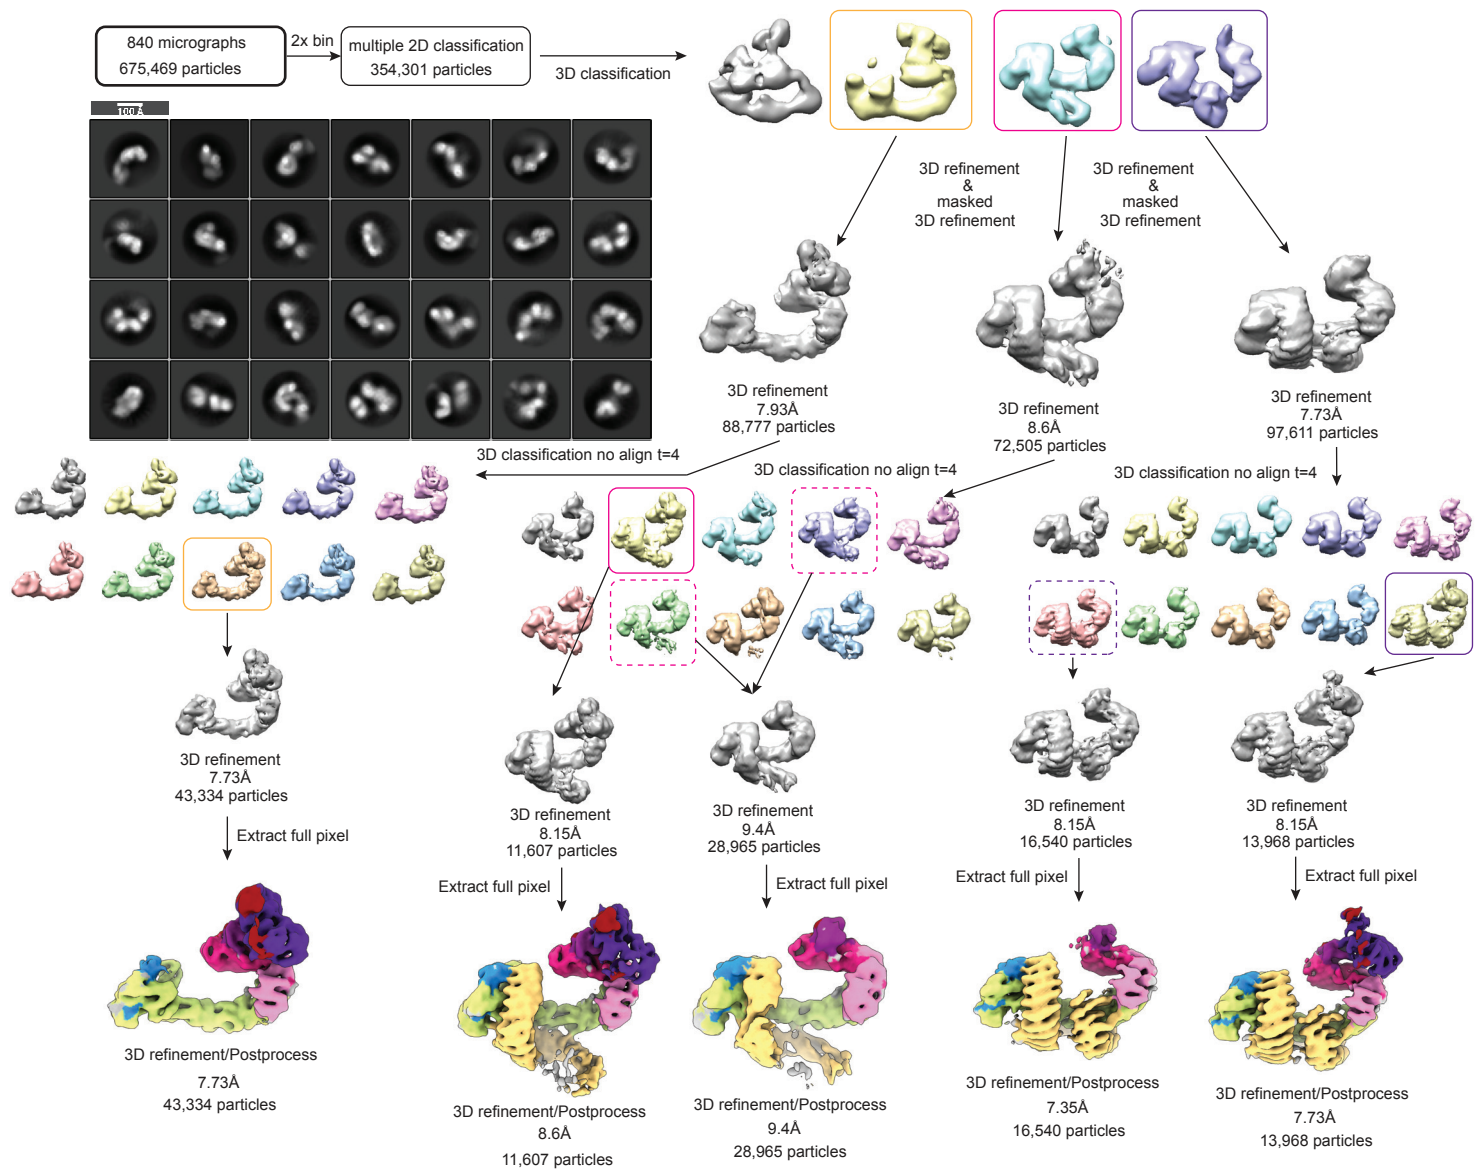

## Processing Schematic 14.

Cryo-EM processing schematic of CAND1-SCF<sup>SKP2</sup>

with substrate complex p27-CKSHS1-CyclinA-CDK2 data collected from Glacios
